# Supplementary material for: Enhanced therapeutic efficacy for glioblastoma immunotherapy with an oncolytic herpes simplex virus armed with anti-PD-1 antibody and IL-12
Source: PubMed Central journal article supplement — Mol Ther Oncol. 2024 Apr 6;32(2):200799. doi: 10.1016/j.omton.2024.200799 (PMC11053222; doi:10.1016/j.omton.2024.200799), 2024-04-06
Supplement: mmc1.pdf [file mmc1.pdf]

**OMTON, Volume 32**

**Supplemental information**

**Enhanced therapeutic efficacy for glioblastoma  
immunotherapy with an oncolytic herpes simplex virus armed with anti-  
PD-1 antibody and IL-12**

**Lei Wang, Xusha Zhou, Xiaoqing Chen, Yuanyuan Liu, Yue Huang, Yuan Cheng, Peigen Ren, Jing Zhao, and Grace Guoying Zhou**

**Figure S1**

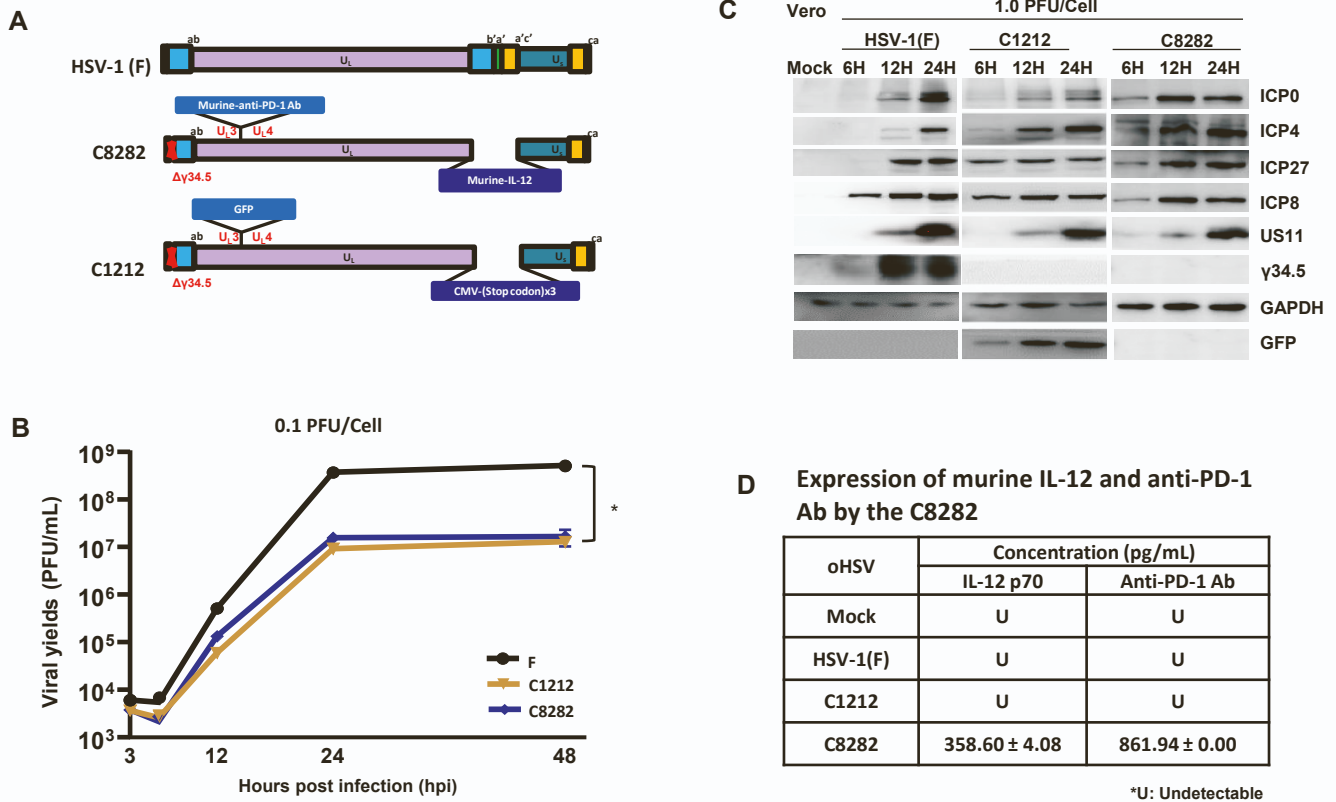

**Figure S1. Construction and Identification of C8282. (A). Virus genome schematic.** Schematic representation of the virus genome, including wild-type HSV-1(F), C1212 (control), and C8282 (murine version of C5252). C8282 contains an expression cassette for the murine IL-12 heterodimer and an antigen-binding fragment (Fab) of anti-murine PD-1Ab, with the IR region replaced. **(B). Growth Curves.** Vero cells exposed to 0.1 PFU of HSV-1(F), C1212, or C8282 per cell. Virus progeny collected at various time points (3, 6, 12, 24, and 48 h) and titered using Vero cells (\* $p < 0.05$ ). **(C). Accumulation of Viral Protein.** Vero cells infected with 1.0 PFU of HSV-1(F), C1212, or C8282 per cell for 6, 12, and 24 h. Cell samples collected at specified hours post-infection. Proteins separated on 10% denaturing gels and analyzed via immunoblotting with antibodies against specific viral and cellular proteins. **(D). Expression of Murine IL-12 p70 and Anti-PD-1 Ab.**

Figure S2

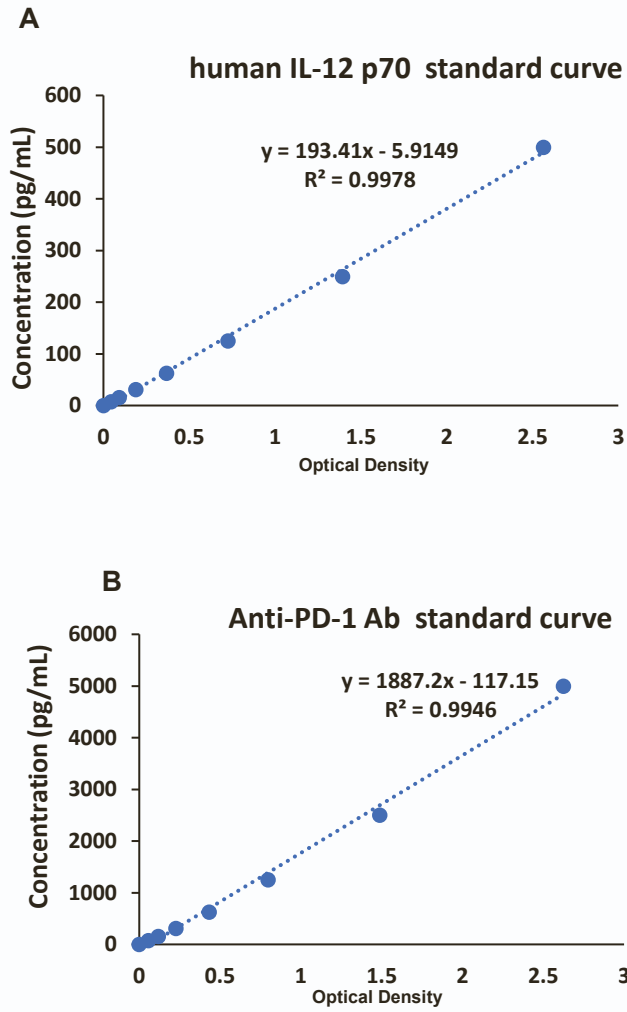

Figure S2. Standard Curves for IL-12 p70 and Anti-PD-1 Antibody.

Figure S3

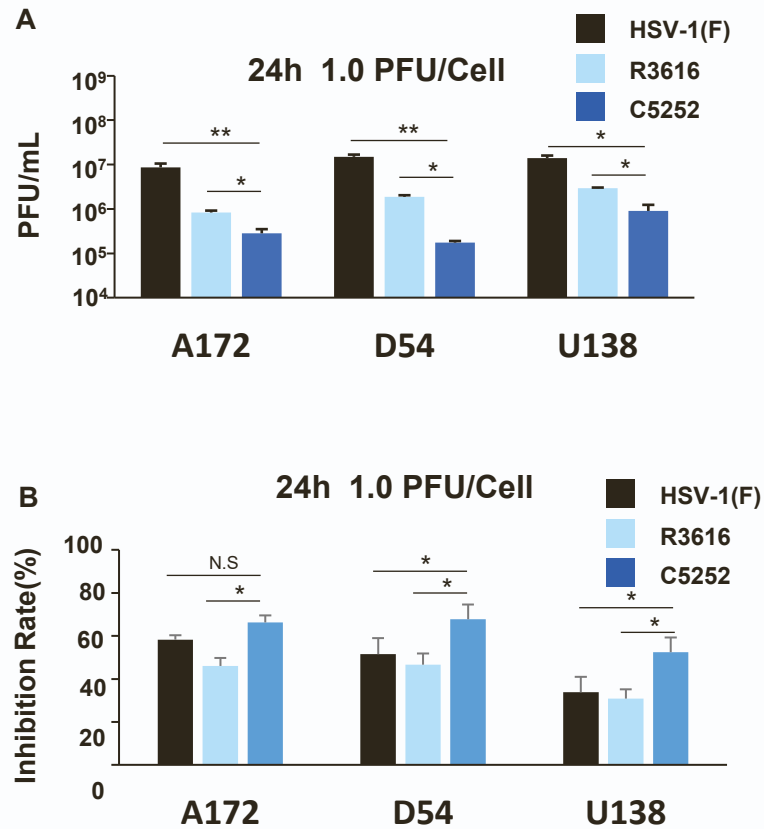

**Figure S3. Virus replication and cytotoxicity in glioblastoma cells. (A). Viral Yields in Glioblastoma Cells.** A172, D54, and U138 glioblastoma cells were exposed to 1.0 PFU of HSV-1(F), R3616, or C5252 per cell. After 2 hours, the inoculum was replaced with fresh medium. Virus progeny was harvested at 24 hpi and quantified using Vero cells. Data presented as mean±SD. **(B). Virus Cytotoxicity in Glioblastoma Cells.** Cytotoxicity of HSV-1(F), R3616, and C5252 in A172, D54, and U138 glioblastoma cells assessed using a CCK8 assay. Cells infected with 1.0 PFU/cell, and cell inhibition rates were measured at 24 hpi. Assays conducted in triplicate, and data represented as mean ± SD. Statistical differences analyzed with a two-tailed Student's t-test (\*p < 0.05, \*\*p < 0.01, <sup>N.S</sup>p > 0.05).

**Figure S4**

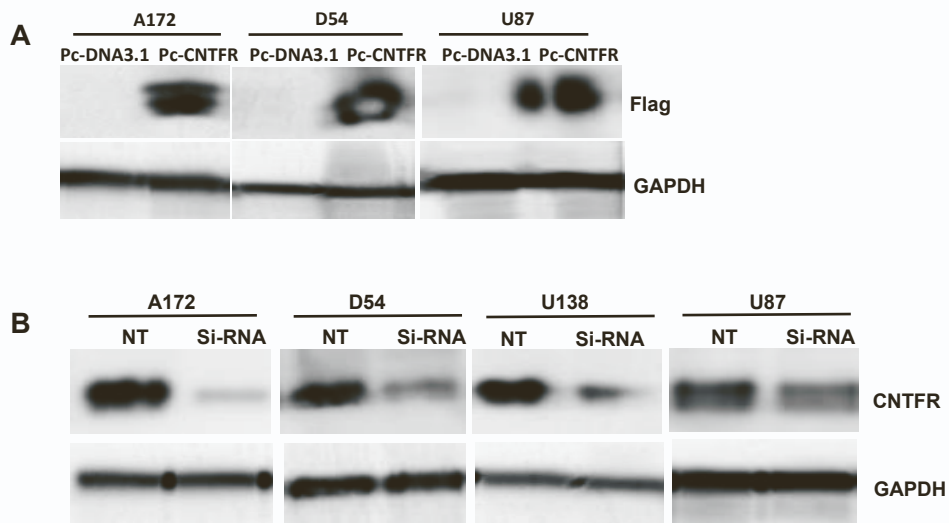

**Figure S4. (A). Upregulation of CNTFR $\alpha$ .** A172, D54, and U87 cells were transfected with Pc-CNTFR $\alpha$  with a Flag tag and Pc-DNA3.1 plasmid for 48 hours. Cell samples collected at specified hours post-infection. Proteins separated on 10% denaturing gels and analyzed via immunoblotting with antibodies against Flag or GAPDH. **(B). Downregulation of CNTFR $\alpha$ .** A172, D54, U138, and U87 cells were transfected with si-CNTFR $\alpha$  and si-NT for 72 hours. Cell samples collected at specified hours post-infection. Proteins separated on 10% denaturing gels and analyzed via immunoblotting with antibodies against CNTFR $\alpha$  or GAPDH.

Figure S5

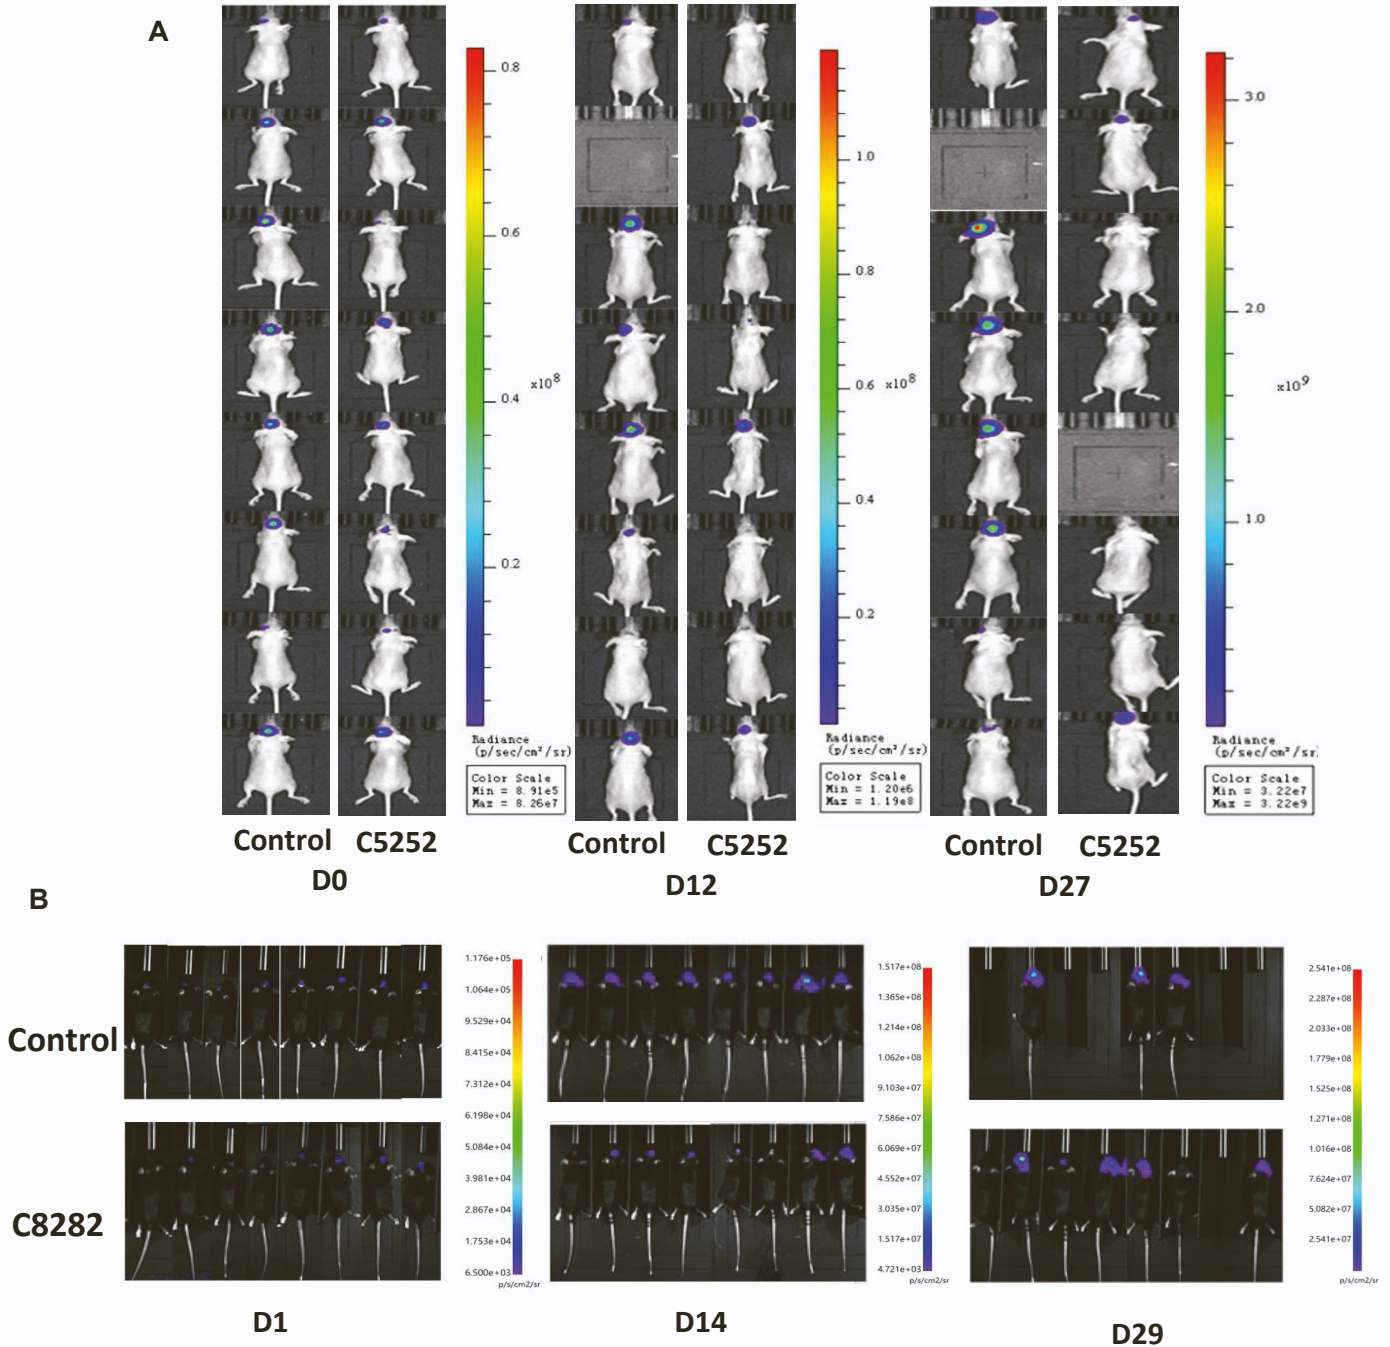

**Figure S5. (A). The Luciferase (Luc) Image in the U-87MG-Luc Orthotopic Tumor Model.** In U-87MG-Luc tumor model, luciferase (Luc) imaging was performed to visualize and monitor tumor growth. The emitted bioluminescent signal from luciferase-expressing tumor cells was captured and presented in the image. **(B). The Luciferase (Luc) Image in the CT-2A-GFP-Luc Orthotopic Tumor Model.** In the CT-2A-GFP-Luc tumor model, luciferase (Luc) imaging was conducted to visualize and monitor tumor progression. The emitted bioluminescent signal from luciferase-expressing tumor cells was captured and depicted in the image, providing insights into tumor growth dynamics.

**Figure S6**

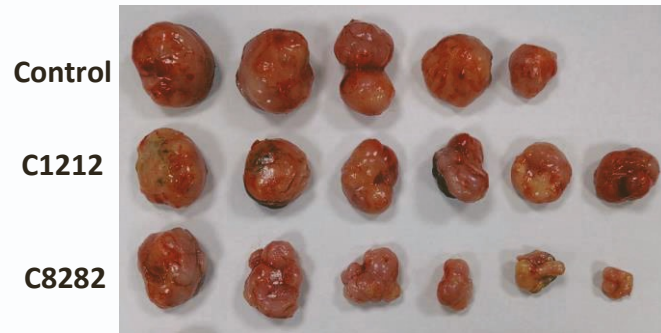

**Figure S6. Dissection of CT-2A Murine Model.** After the conclusion of the murine tumor model experiment, mice were euthanized, and tumor dissections were carried out. Tumor samples were carefully collected.
