# Supplementary material for: Enhanced therapeutic efficacy for glioblastoma immunotherapy with an oncolytic herpes simplex virus armed with anti-PD-1 antibody and IL-12
Source: PubMed Central journal article supplement — Mol Ther Oncol. 2024 Apr 6;32(2):200799. doi: 10.1016/j.omton.2024.200799 (PMC11053222; doi:10.1016/j.omton.2024.200799), 2024-04-06
Supplement: mmc2.pdf [file mmc2.pdf]

# Enhanced therapeutic efficacy for glioblastoma immunotherapy with an oncolytic herpes simplex virus armed with anti-PD-1 antibody and IL-12

Lei Wang,<sup>1,2,5</sup> Xusha Zhou,<sup>3,5</sup> Xiaoqing Chen,<sup>3</sup> Yuanyuan Liu,<sup>3</sup> Yue Huang,<sup>3</sup> Yuan Cheng,<sup>4</sup> Peigen Ren,<sup>1</sup> Jing Zhao,<sup>2</sup> and Grace Guoying Zhou<sup>2</sup>

<sup>1</sup>Research Center for Reproduction and Health Development, Institute of Biomedicine and Biotechnology, Shenzhen Institutes of Advanced Technology, Chinese Academy of Sciences, 1068 Xueyuan Avenue, Shenzhen University Town, Shenzhen 518055, China; <sup>2</sup>Shenzhen International Institute for Biomedical Research, 1301 Guan-Guang Road, Building 1-B, Silver Star Hi-tech Industrial Park, Longhua District, Shenzhen 518110, China; <sup>3</sup>ImmVira Co., Ltd., Shenzhen 518110, China; <sup>4</sup>Department of Medical Oncology, Jinling Hospital, Affiliated Hospital of Medical School, Nanjing University, Nanjing 210002, China

**Glioblastoma is the most common and aggressive malignant brain tumor and has limited treatment options. Hence, innovative approaches are urgently needed. Oncolytic virus therapy is emerging as a promising modality for cancer treatment due to its tumor-specific targeting and immune-stimulatory properties. In this study, we developed a new generation of oncolytic herpes simplex virus C5252 by deletion of a 15-kb internal repeat region and both copies of  $\gamma$ 34.5 genes. Additionally, C5252 was armed with anti-programmed cell death protein 1 antibody and interleukin-12 to enhance its therapeutic efficacy for glioblastoma immune-virotherapy. *In vitro* and *in vivo* experiments demonstrate that C5252 has a remarkable safety profile and potent anti-tumor activity against glioblastoma. Mechanistic studies demonstrated that C5252 specifically induces cell apoptosis by caspase-3/7 activation via downregulating ciliary neurotrophic factor receptor  $\alpha$ . Furthermore, the enhanced anti-tumor therapeutic efficacy of C5252 in a subcutaneous glioblastoma model and an orthotopic glioblastoma model was confirmed. Moreover, syngeneic mouse models showed that the murine surrogate of C5252 has superior anti-tumor activity compared to the unarmed backbone virus, with enhanced immune activation. Taken together, our findings support C5252 as a promising therapeutic option for glioblastoma treatment, positioning it as a highly promising candidate for clinical translation.**

## INTRODUCTION

Malignant gliomas, as the most aggressive primary brain tumors, account for 30% of all primary central nervous system (CNS) tumors in adults, exhibiting poor survival with a median of 12–18 months.<sup>1,2</sup> In children, CNS tumors represent 25% of all childhood malignancies and remain the leading cause of cancer-related morbidity and mortality<sup>3</sup>; despite the implementation of various intricate treatment modalities, numerous children continue to contend with enduring and potentially incapacitating conditions.<sup>4</sup> Nowadays, glioblastoma (GBM) remains one of the most challenging malignancies to treat. The main causes of these failures include GBM molecular heterogene-

ity,<sup>5,6</sup> a “cold” immunosuppressive tumor microenvironment (TME),<sup>7,8</sup> and the presence of the blood-brain barrier, which hinders drug penetration within brain tissue.<sup>9</sup> Nevertheless, advances in multimodal treatment options and drug development come from innovative treatment strategies for GBM, such as multispecific “off-the-shelf” chimeric antigen receptor (CAR)-T therapy, oncolytic viral therapy, and autologous dendritic cell vaccination.

With regards to oncolytic viral therapy, a number of oncolytic vectors including engineered forms of retrovirus, adenovirus, adeno-associated virus, and herpes simplex virus type 1 (HSV-1)<sup>10</sup> have been studied in the pursuit of novel therapies for GBM for the past several decades. Some of these oncolytic viruses have been investigated in several clinical trials of GBM and showed promising results. Among them, DELYACT oncolytic virus G47 $\Delta$ , the third generation oncolytic HSV-1 (oHSV), has received conditional and time-limited approval in Japan for the treatment with malignant gliomas based on the phase 2 study results. The backbone of G47 $\Delta$ , G207 (derived from wild-type strain F), as the first oHSV developed to treat GBM, has deletions of two  $\gamma$ 34.5 genes, which are neuropathogenic and overcome host protein shutoff and innate signaling.<sup>11</sup> G207 has been studied in multiple clinical trials for GBM, including a recent

Received 4 June 2023; accepted 3 April 2024;  
<https://doi.org/10.1016/j.omton.2024.200799>.

<sup>5</sup>These authors contributed equally

**Correspondence:** Peigen Ren, PhD, Research Center for Reproduction and Health Development, Institute of Biomedicine and Biotechnology, Shenzhen Institutes of Advanced Technology, Chinese Academy of Sciences, 1068 Xueyuan Avenue, Shenzhen University Town, Shenzhen 518055, China.  
**E-mail:** [pg.ren@siat.ac.cn](mailto:pg.ren@siat.ac.cn)

**Correspondence:** Jing Zhao, PhD, Shenzhen International Institute for Biomedical Research, 1301 Guan-Guang Road, Building 1-B, Silver Star Hi-tech Industrial Park, Longhua District, Shenzhen 518110, China.  
**E-mail:** [jingzhao@siitm.org.cn](mailto:jingzhao@siitm.org.cn)

**Correspondence:** Grace Guoying Zhou, PhD, Shenzhen International Institute for Biomedical Research, 1301 Guan-Guang Road, Building 1-B, Silver Star Hi-tech Industrial Park, Longhua District, Shenzhen 518110, China.  
**E-mail:** [zhoug@siitm.org.cn](mailto:zhoug@siitm.org.cn)

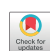

pediatric trial with promising results.<sup>12</sup> Despite some promising efficacy being shown,<sup>12,13</sup> current evidence indicates that oHSV monotherapy needs to be enhanced, due to the failures of oHSV immunovirotherapy including an immunosuppressive TME and inadequate immune responses, as well as low viral replication and spread.<sup>14</sup> Thus, combination therapy of oHSV with other immunotherapies or oncolytic viruses armed with therapeutic payload genes for local expression has emerged.<sup>15,16</sup>

Based on the G207 backbone, another oHSV, M032, was modified to express secreted interleukin-12 (IL-12), which promotes an immune response and produces an anti-angiogenic effect.<sup>17</sup> M032 is currently being studied in phase 1 brain tumor clinical trials in children (ClinicalTrials.gov: NCT02457845) and adults (ClinicalTrials.gov: NCT02062827), respectively.<sup>18</sup> Another ongoing evaluation of the combination of pembrolizumab with M032 in patients with recurrent/progressive GBM, anaplastic astrocytoma, or gliosarcoma is in phase 1/2 trial (NSC733972). In addition, Xin Xie et al. engineered two oncolytic viruses expressing a mouse anti-programmed cell death protein 1 (PD-1) antibody (Ab) or mouse IL-12, respectively, both of which demonstrated substantial anti-tumor effects. The combination of both viruses generated a vaccine-like response and significantly extended the overall survival of mice, which suggested that combining both engineered oncolytic viruses may offer a robust immunotherapeutic strategy for patients with cancer.<sup>19</sup> To further enhance the oncolytic and immune efficacy of oHSVs, we genetically engineered a new generation of oHSV, C5252, which can deliver IL-12 and anti-PD-1 Ab into GBM while simultaneously eliminating both copies of the  $\gamma$ 34.5 genes and a 15-kb internal repeat (IR) region. The safety and anti-tumor efficacy were confirmed in this study.

## RESULTS

### Construction and identification of oHSV C5252 *in vitro*

In this study, oHSV C5252, a genetically modified replication-competent HSV-1, was designed to remove two copies of the  $\gamma$ 34.5 genes in both the terminal repeat region and the IR region. Meanwhile, C5252 was modified by introducing a cassette encoding the heterodimer of IL-12 to replace the IR region, and an antigen-binding fragment (Fab) of an anti-human PD-1 Ab was inserted between  $U_L3$  and  $U_L4$  (Figure 1A). Here, another oHSV used, R3616<sup>20</sup> (Figure 1A), also deleted two copies of the  $\gamma$ 34.5 genes. The DELYTACT oncolytic virus G47 $\Delta$  has been modified from R3616 and approved in Japan for malignant glioma treatment. Thus, to confirm the safety and efficacy of C5252 for glioma treatment, we used oHSV R3616 as a first-generation control. As shown in Figure 1B, the growth kinetics analysis in Vero cells reveals that both C5252 and R3616 exhibit lower viral yields compared to wild-type HSV(F) infection. What's more, C5252 showed relatively lower viral yields than R3616, confirming the genetic attenuation of C5252. Further confirmation of the genetic attenuation of C5252 and R3616 was obtained by evaluating the accumulation of viral proteins using specific Abs against viral  $\alpha$  (ICP0, ICP4, ICP27),  $\beta$  (ICP8), and  $\gamma$  ( $U_S11$ ,  $\gamma$ 34.5) gene products. The results demonstrate significantly reduced protein expression levels in C5252 compared to wild-type HSV-1. Similarly, R3616 showed lower

protein expression levels for all proteins, except for ICP4 and ICP8, when compared to wild-type HSV-1. Importantly, both C5252- and R3616-infected samples exhibited no detectable expression of the  $\gamma$ 34.5 gene, confirming the successful deletion of the  $\gamma$ 34.5 genes in these strains (Figure 1C). The expression of payload genes of C5252, including IL-12 p70 and anti-PD-1 Ab, were detected via ELISA, and the average amounts were 401.69 and 242.52 pg/mL, respectively (Figure 1D). The standard curves for IL-12 p70 and the anti-PD-1 Ab are shown in the Figure S2.

### oHSV C5252 has a higher cytotoxic activity and lower replication efficiency in GBM cells

To evaluate the replication and cell-killing ability of C5252 in GBM cells, different GBM cell lines including A172, D54, U138, U87, and D548 were infected with C5252 for 48 h at a multiplicity of infection (MOI) of 0.1. The results showed that C5252 had a lower replication ability compared to oHSV R3616 in most of the GBM cells, with a significant decrease in progeny yield observed in A172, U138, U87 ( $p < 0.05$ ), and D54 cells ( $p < 0.01$ ) (Figure 2A); each result is presented as the mean  $\pm$  standard deviation of three replicates. On the other hand, as shown in Figure 2C, C5252 infection for 48 h resulted in increased cytotoxicity in A172, D54, U87 ( $p < 0.05$ ), and U138 ( $p < 0.001$ ) glioma cells when compared to R3616 at an MOI = 0.1. Similarly, at an MOI = 1, C5252 showed lower replication efficiency but higher cell-killing ability compared to R3616 (Figures 2B and 2D). Specifically, C5252 replication was significantly reduced in A172 ( $p < 0.01$ ), D54 and D458 ( $p < 0.05$ ) cells, while the cytotoxicity was significantly enhanced in A172 and U87 ( $p < 0.05$ ), U138 and D458 ( $p < 0.01$ ) cells. Intriguingly, wild-type HSV-1(F) exhibited the highest replication ability in all tested cell lines, but demonstrated lower cytotoxicity compared to C5252. These results suggest that C5252 has a remarkable cytotoxic effect with relatively low efficiency of viral propagation in GBM cells, indicating its potential as a safe and effective treatment option for GBM. Moreover, at 24 h post-infection (hpi) (MOI = 1), lower virus replication and higher cytotoxic activity of C5252 are shown, which is consistent with that at 48 hpi (Figures S3A and S3B).

### Downregulation of CNTFR $\alpha$ expression enhances apoptotic cell death in GBM cells infected with C5252

To investigate why C5252 has lower replication ability but higher cytotoxic activity, additional studies were conducted. GBM cell lines A172, D54, U138, U87, and D458 were infected with C5252, R3616, or wild-type HSV-1(F) at an MOI of 5. Caspase-3/7 activity, which indicates apoptotic cell death, was measured 8 h after infection. The results in Figure 3A show that C5252 infection induced a significant increase in caspase-3/7 activity compared to R3616 and wild-type HSV-1(F). Specifically, in the case of A172 and D54 cell lines, the increase was highly significant ( $p < 0.01$ ), while for U138 and D458, it was statistically significant ( $p < 0.05$ ). These findings suggest that C5252 induces a higher level of cell death due to increased activation of caspase-3/7. To further explore why GBM cells were sensitive to C5252-induced apoptotic cell death, RNA deep sequencing was used to analyze the expression profiles between C5252- and R3616-infected A172 cells (data not shown).

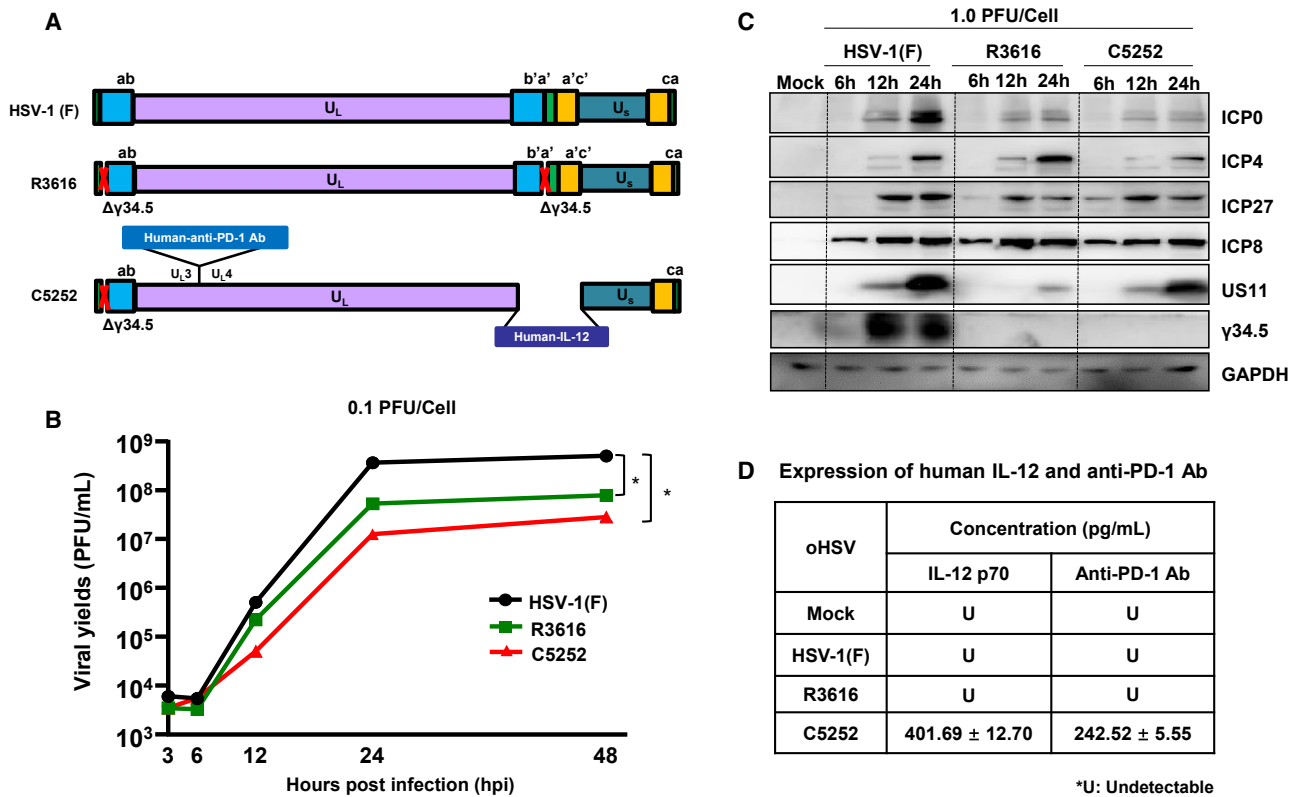

**Figure 1. Virus construction and identification**

(A) Schematic representation of the virus genome. Wild-type HSV-1(F) is the prototype strain used in this laboratory and R3616 has a deletion of two copies of  $\gamma$ 34.5. C5252 is a genetically modified replication-competent HSV-1 in which the internal repeat (IR) sequence (IR region) of 15 kb and the remaining copy of  $\gamma$ 34.5 genes in the terminal repeat (TR) region were deleted, resulting in the removal of both copies of the  $\gamma$ 34.5 genes as well as one copy each of diploid genes  $\alpha$ 0,  $\alpha$ 4, and *LAT*. The IR region is replaced with an expression cassette of heterodimer of IL-12. Another expression cassette of antigen-binding fragment (Fab) of an anti-PD-1 Ab is inserted into the genome between *UL*3 and *UL*4. (B) Growth curves. Vero cells were exposed to HSV-1(F), R3616, or C5252 (MOI = 0.1) over 48 h. Virus progeny were collected at 3, 6, 12, 24, and 48 h and titered via plaque assay using Vero cells (\* $p < 0.05$ ). (C) Accumulation of viral protein. Vero cells were infected with HSV-1(F), R3616, or C5252 (MOI = 1) for 6, 12, and 24 hpi. Cell samples were collected at indicated time points. Proteins were separated on 10% denaturing gels and analyzed via immunoblotting with antibodies targeting ICP0, ICP4, ICP27, ICP8, US11,  $\gamma$ 34.5, and GAPDH. (D) The expression of human IL-12 p70 and anti-PD-1 Ab in HSV-1(F)-, R3616-, and C5252-infected Vero cells. Vero cells were mock infected (Mock) or infected with HSV-1(F), R3616, or C5252. After 48 h, cell culture media were collected. Human IL-12 and anti-PD-1 Ab levels were quantified using ELISA, following a standard curve constructed with purified IL-12 protein and anti-PD-1 Ab as described in the [materials and methods](#).

Notably, the expression of ciliary neurotrophic factor receptor  $\alpha$  (CNTFR $\alpha$ ) in A172 cells infected with C5252 showed a significant decrease compared to that of R3616 infection. The qPCR assay further confirmed that the CNTFR $\alpha$  mRNA level was significantly decreased in C5252-infected cells, particularly in A172, D54, U138, and U87 cells (Figure 3B). Thus, to explore whether CNTFR $\alpha$  can be considered as one of the factors responsible for increased apoptosis in C5252-infected cells, a rescue experiment was performed (Figures 3C and S4 A). As shown in Figure 3D, a significant difference was observed when transfected with a control plasmid pcDNA3.1 among C5252, R3616, and wild-type HSV-1(F)-infected cells, aligning with the findings presented in Figure 3A. However, when CNTFR $\alpha$  expression was rescued during infection through transfection (Pc-CNTFR $\alpha$ ), no significant difference in caspase-3/7 activity was observed in the C5252, R3616, or HSV-1(F) infection groups. Furthermore, the knockdown of CNTFR $\alpha$  using

small interfering RNA (siRNA), which mimics the C5252-induced downregulation of CNTFR $\alpha$ , resulted in a significant increase in caspase-3/7 activity (Figures 3E, 3F, and S4B). All these results provide further confirmation of the role of CNTFR $\alpha$  downregulation in enhancing caspase-3/7 activation during C5252 infection. CNTFR $\alpha$  is the receptor of CNTF, which promotes the survival of various neuronal cell populations, including glioma cells.<sup>21</sup> Furthermore, the CNTF/CNTFR pathway exerts an anti-apoptotic effect by suppressing caspase-3 activation, and knockdown of CNTFR $\alpha$  significantly increased cell apoptosis in glioma cells.<sup>22,23</sup> Thus, the downregulation of CNTFR $\alpha$  by C5252 infection, leading to increased caspase activation, contributes to its higher cytotoxic activity.

#### The safety evaluation of C5252 *in vivo*

To assess the toxicity of oHSV C5252 in the intracranial cavity, BALB/c mice were grouped and received a single intracranial

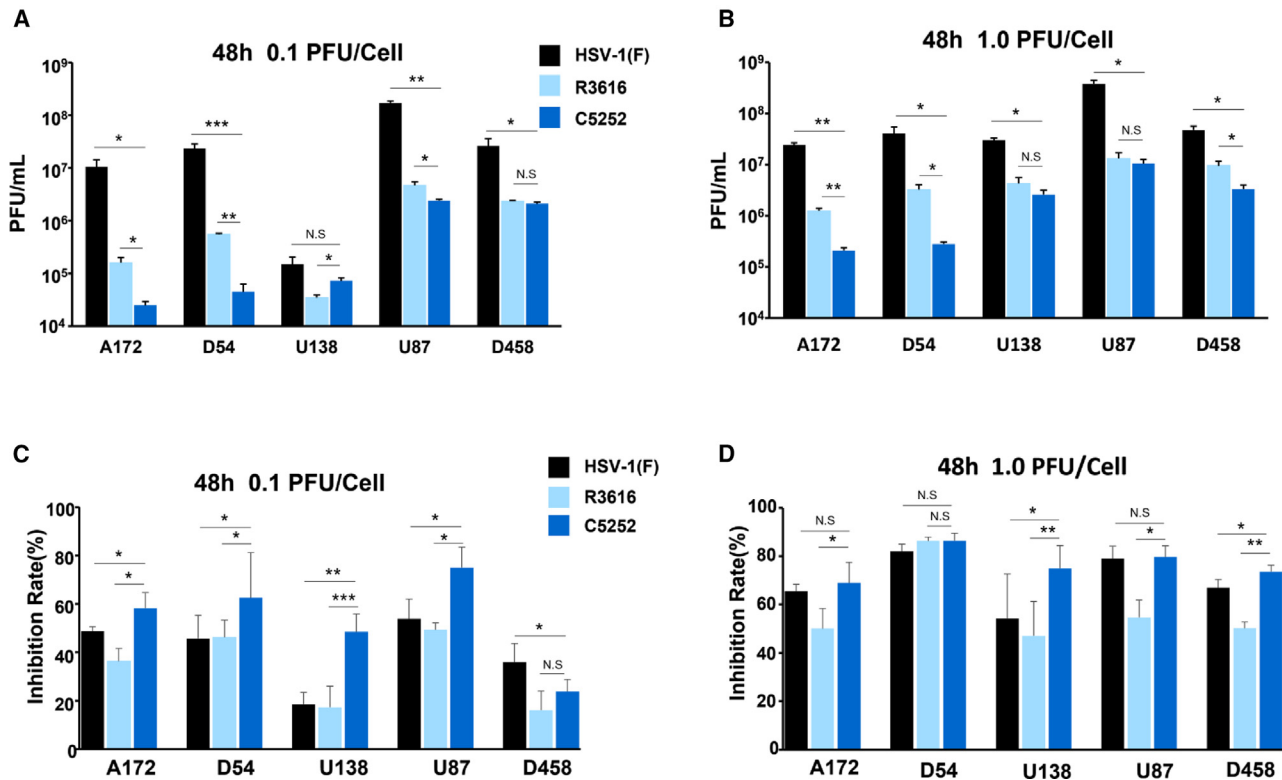

**Figure 2. Virus replication and cytotoxicity in glioblastoma cells**

(A) Glioblastoma cells (A172, D54, U138, U87, and D458) were exposed to 0.1 PFU of HSV-1(F), R3616, or C5252 per cell. Virus progeny were collected at 48 hpi and titrated using Vero cells. (B) Similar to (A) but cells were exposed to 1.0 PFU per cell. (C) Glioblastoma cells were infected with HSV-1(F), R3616, or C5252 at 0.1 PFU per cell, and cytotoxicity was assessed via CCK8 assay at 48 hpi. (D) Similar to (C) but cells exposed to 1.0 PFU per cell. Data represent mean  $\pm$  SD; N.S.  $p > 0.05$ , \* $p < 0.05$ , \*\* $p < 0.01$ , and \*\*\* $p < 0.001$ . Student's t test (two-tailed) was used for statistical analysis.

injection of oHSV C5252 with an initial dose level of  $1.5 \times 10^2$  plaque-forming units (PFUs), which was then escalated by one-log increments until the dose of  $1.5 \times 10^5$  PFUs. After the intracranial injection, the animals were observed daily for 14 days, and survival data were analyzed to calculate  $LD_{50}$ . As previous reported,<sup>24</sup> R3616 was used as a positive control. As shown in Figure 4A, the  $LD_{50}$  values of both oHSV C5252 and R3616 are over  $1.5 \times 10^5$  PFUs, while that of wild-type HSV-1(F) is only  $1.88 \times 10^2$  PFUs, indicating an over 800-fold attenuation when compared to the wild-type virus. Furthermore, there were no changes in physical appearance or behavioral abnormalities observed in the C5252- or R3616-treated animals, indicating that C5252 has a comparable safety profile to R3616.

It is important to investigate whether C5252, as an oHSV, can establish latency in neurons. Therefore, we employed the commonly used mouse trigeminal ganglion (TG) infection model by corneal inoculation<sup>25,26</sup> to assess the latency and reactivation properties of C5252. BALB/c mice were grouped and inoculated with C5252 and HSV-1(F). TG was extracted at indicated time points, and DNA was quantified using qPCR to determine the viral DNA copy number, as illustrated in Figure 4B. The wild-type HSV-1(F) virus exhibited the classic latency pattern, with viral DNA levels reaching a peak within

14 days before declining. In contrast, C5252 displayed a distinct pattern compared to HSV-1(F); viral DNA levels remained below the limit of quantitation (44 copies/50 ng DNA) at all measured time points.

Furthermore, TGs were excised at 30 days post-infection and immediately incubated in a medium containing an anti-nerve growth factor (NGF) Ab for 24 h to induce reactivation from latency. Total RNA was extracted, and mRNA levels for viral  $\alpha$  (*ICP27*),  $\beta$  (*TK*), and  $\gamma$  (*UL41*, *VP16*) gene products, as well as latency-associated transcript (*LAT*), were quantified as described in the materials and methods. The *LAT* regulates the establishment of the latent state and is required for >65% of the latent infections established by HSV-1. Moreover, *LAT* can protect sensory neurons and enhance the establishment of latency in the peripheral nervous system.<sup>27</sup> The results showed a dramatic increase in *ICP27*, *TK*, *UL41*, and *VP16* mRNAs and a decrease in *LAT* in HSV-1(F)-infected samples after 24 h of incubation with anti-NGF compared to the excision time (0 h), indicating reactivation from latency (Figure 4C). However, there was only a slight increase observed in the levels of *ICP27* and *TK* mRNA in C5252 samples, while *UL41* and *VP16* mRNA were not detectable (Figure 4D). All these results suggested C5252's inability to establish latency and

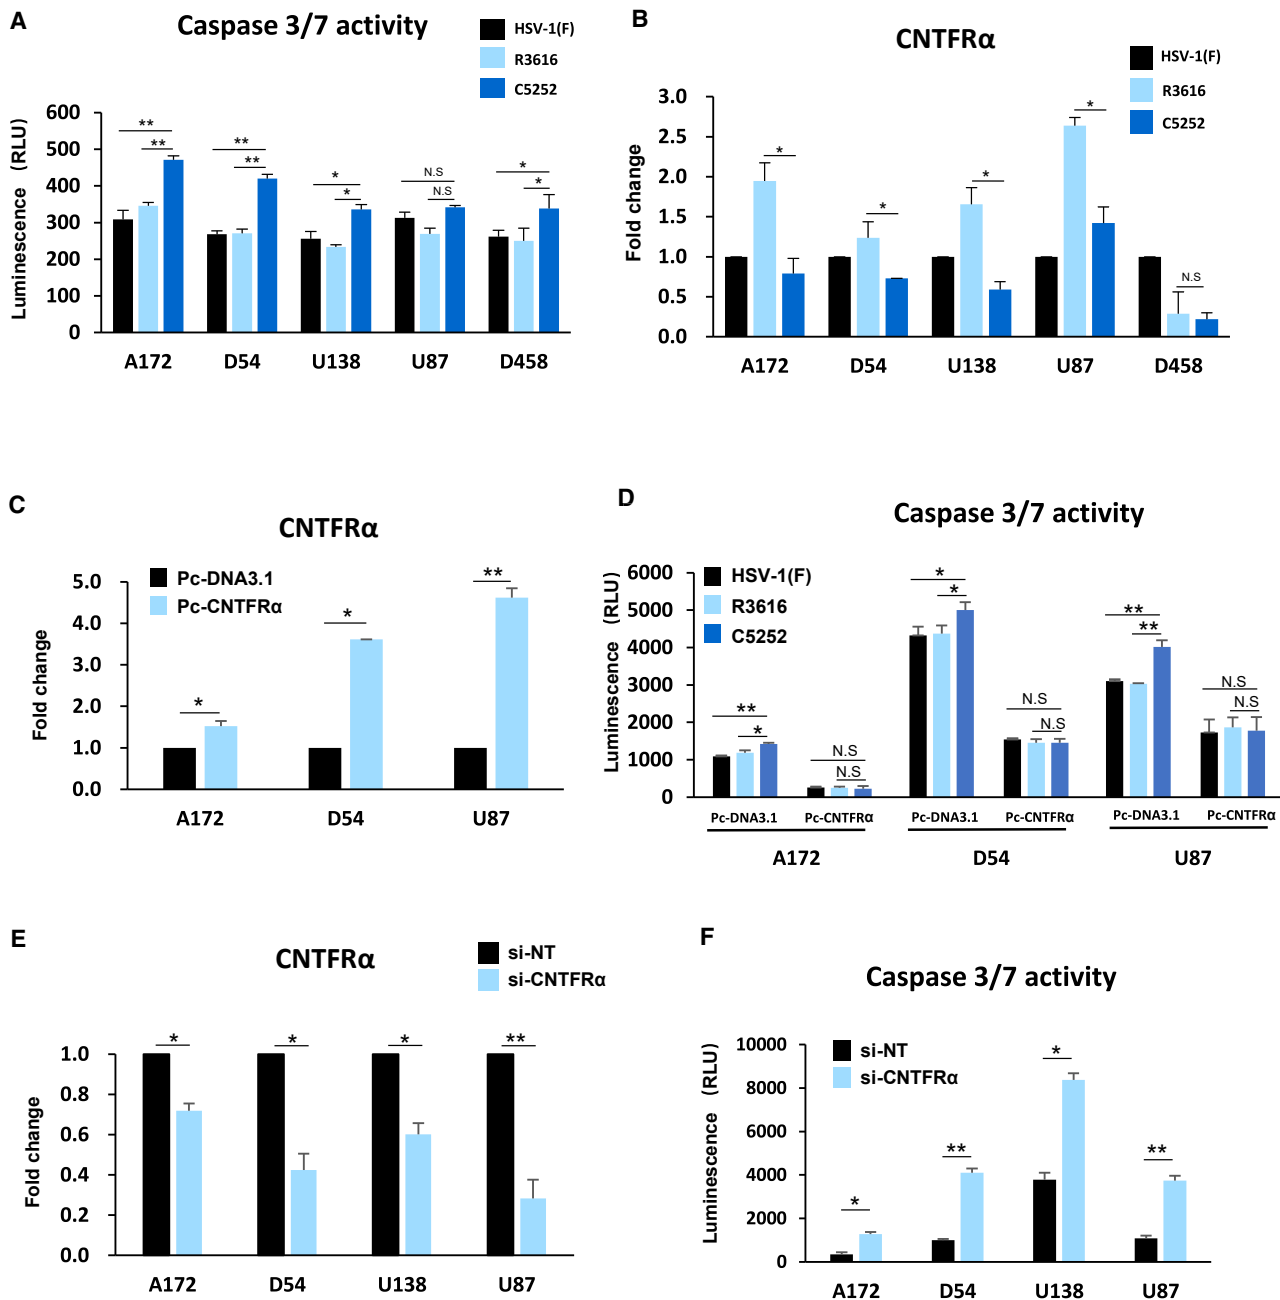

**Figure 3. Caspase-3/7 activity and CNTFR $\alpha$  expression during C5252 infection in glioblastoma cells**

(A) Caspase-3/7 activity in glioblastoma cells. Caspase-3/7 activity was assessed at 8 h post-infection (hpi) with HSV-1(F), R3616, or C5252 in glioblastoma cells. Luminescence-based measurements are expressed as relative light units (RLUs). Data are from three independent trials and presented as mean  $\pm$  SD. Statistically significant differences between C5252 and R3616 indicated (N.S.  $p > 0.05$ , \* $p < 0.05$ , and \*\* $p < 0.01$ ). (B) CNTFR $\alpha$  mRNA levels in glioblastoma cells. Glioblastoma cells were infected with 0.1 PFU of HSV-1(F), R3616, or C5252 per cell. At 48 hpi, mRNA levels of CNTFR $\alpha$  were measured and normalized to HSV-1(F)-infected cells. Data are from three independent trials and presented as mean  $\pm$  SD. Statistically significant differences between C5252 and R3616 are indicated (\* $p < 0.05$ ). (C) CNTFR $\alpha$  overexpression in glioblastoma cells. CNTFR $\alpha$  overexpression was achieved using the Pc-CNTFR $\alpha$  plasmid. Real-time PCR assessed the fold change in CNTFR $\alpha$  mRNA levels compared to control (Pc-DNA3.1)-transfected cells. Statistically significant differences between Pc-CNTFR $\alpha$  and Pc-DNA3.1 are indicated (\* $p < 0.05$  and \*\* $p < 0.01$ ). (D) Caspase-3/7 activity in overexpressed CNTFR $\alpha$  glioblastoma cells. After plasmid transfection, cells were infected with 1.0 PFU of HSV-1(F), R3616, or C5252 per cell. Caspase-3/7 activity was assessed 24 h post-infection. Data are from three independent trials and presented as mean  $\pm$  SD. Statistically significant differences between C5252 and R3616 are indicated (\* $p < 0.05$  and \*\* $p < 0.01$ ). (E) CNTFR $\alpha$  knockdown in glioblastoma cells. Glioblastoma cells were transfected with siRNA targeting CNTFR $\alpha$  (si-CNTFR $\alpha$ ) or non-

(legend continued on next page)



reactivate, consistent with a previous report in which selective deletion of the  $\gamma 34.5$  gene abolishes this capacity.<sup>28</sup> Taken together, these findings suggest that C5252 has a lower toxicity and diminished ability to establish latency and reactivate in the brain, which makes it a safe candidate for the treatment of GBM.

### The anti-tumor efficacy of C5252 in subcutaneous and orthotopic GBM models

*In vitro* studies have shown that C5252 has higher cytotoxic activity against GBM cells than R3616. To further evaluate the anti-tumor activity of C5252 *in vivo*, U87 and D54 subcutaneous xenografts were utilized. Intratumoral injections of C5252 and R3616 were administered once a week, and tumor volume was measured. As shown in Figures 5A and 5B, C5252 was significantly more effective than R3616 in reducing tumor volume in both models, consistent with the *in vitro* findings. In the next step, the luciferase (Luc) gene-expressing human U-87MG-Luc cells were intracranially injected into nude mice to create an orthotopic model of human GBM. Two weeks after tumor inoculation, C5252 or phosphate-buffered saline (PBS) as a vehicle control was intracerebrally injected. Tumor progression was monitored by Luc-based imaging (Figures 5C and 5A). C5252 treatment significantly inhibited the progression of GBM and prolonged the survival of the tumor-bearing mice (Figure 5D). The anti-tumor activity was further validated in an immunocompetent orthotopic mouse model treated with murinized C8282 virus. Murine GBM CT-2A cells expressing GFP and Luc were intracranially injected into C57BL/6 mice to establish an orthotopic model of murine GBM, as described in the materials and methods. C8282 or PBS as a vehicle control was intracerebrally injected once a week three times. Tumor progression and survival rates were monitored (Figures 5E and 5B). The results showed that C8282 treatment markedly inhibited the progression of GBM and prolonged the survival of the tumor-bearing mice (Figure 5F).

### The anti-tumor activity of the murine version of C5252 in immunocompetent GBM models

To assess the efficacy of our oHSV in a mouse model with fully functioning immune systems, we developed C8282, a variant of C5252 specifically designed for use in mice. To create C8282, the human IL-12 and anti-PD-1 Ab were replaced with their murine equivalents. In addition, we generated C1212 as a control virus to evaluate the combined effect of the immune-activating payload genes, IL-12 and anti-PD-1 Ab. Figure S1 provides details on the construction and identification of both C1212 and C8282. We performed intratumoral injections of C8282 every 3 days for a total of six injections, which significantly reduced tumor volume in the mouse CT-2A GBM syngeneic model compared to the backbone C1212 (Figure 6A). This suggests that the inclusion of IL-12 and anti-PD-1 Ab payload genes further enhanced the anti-tumor efficacy. On the final day of the

experiment, the tumors in the mice were dissected, and the images are shown in Figure S6. To investigate whether C8282 treatment increased immune activation against tumors and resulted in greater anti-tumor activity, we used a CT-2A syngeneic mouse model and injected C1212, C8282 oHSV, or a vehicle control once. Tumors were excised at specified time points after single injection, and the production of key indicators of immune activation, interferon (IFN)- $\gamma$  and tumor necrosis factor  $\alpha$  (TNF- $\alpha$ ), was measured using ELISA. Our results showed that the expression levels of IFN- $\gamma$  and TNF- $\alpha$  in tumors peaked 1 day after virus injection and gradually decreased thereafter. Moreover, C8282 induced higher levels of IFN- $\gamma$  and TNF- $\alpha$  compared to the C1212 group at 1 day post-infection and with a longer induction of TNF- $\alpha$ . These findings confirm that oHSV carrying IL-12 and anti-PD-1 Ab genes induced stronger immunotherapy against GBM.

## DISCUSSION

Pediatric and adult GBMs are highly aggressive brain tumors that continue to pose a major treatment challenge due to their high morbidity and mortality rates. However, recent developments in the field of engineered oHSV therapy have shown promise in treating these tumors. In this study, we constructed a novel oHSV C5252 by deleting the 15-kb IR region and both copies of the  $\gamma 34.5$  genes while also expressing human IL-12 and anti-PD-1 Ab. We then conducted preclinical safety and anti-tumor efficacy assessments of C5252, comparing it to the first-generation oHSV R3616, which also has two  $\gamma 34.5$  gene defects, and the backbone of G207, which is currently in clinical trials for GBM treatment in both children and adults. Our *in vitro* studies of C5252 revealed that though its replication ability was decreased, its cell-killing capability was significantly increased in GBM cells. Furthermore, C5252 infection specifically induced caspase-dependent apoptosis in GBM cells via downregulation of CNTFR $\alpha$ , although the underlying mechanisms need to be further explored. These findings suggest that C5252 has the potential to be a more effective treatment option for GBMs compared to other oHSV therapies currently in use. Future studies are needed to further explore the clinical efficacy and safety of C5252 in treating this devastating disease.

For the safety assessment of C5252, *in vivo* study showed that C5252 is highly attenuated with a LD<sub>50</sub> over  $1.5 \times 10^5$  PFUs, while that of HSV-1(F) is only  $1.88 \times 10^2$  PFUs, which is consistent with another murine study in which 50% of mice died within 3–14 days after intracerebral inoculation of HSV-1(F) at a dose of  $10^3$  PFUs.<sup>29</sup> What's more, the viral DNA was detected to be lower than the limited detection during the latency phase, which further confirmed that the  $\gamma 34.5$ -deleted oHSV was less capable of establishing latency or reactivating from latency.<sup>30</sup> For the anti-tumor activity evaluation of C5252 *in vivo*, the data showed that oHSV

target siRNA (si-NT). CNTFR $\alpha$  downregulation efficiency was assessed by real-time PCR. Statistically significant differences between si-CNTFR $\alpha$  and si-NT are indicated (\* $p < 0.05$  and \*\* $p < 0.01$ ). (F) Caspase-3/7 activity in CNTFR $\alpha$  knockdown glioblastoma cells. Caspase-3/7 activity was measured using the Caspase-Glo 3/7 kit in CNTFR $\alpha$  knockdown glioblastoma cells. Results are presented as RLU. Data are from three independent trials and presented as mean  $\pm$  SD. Statistically significant differences between C5252 and R3616 are indicated (\* $p < 0.05$  and \*\* $p < 0.01$ ).

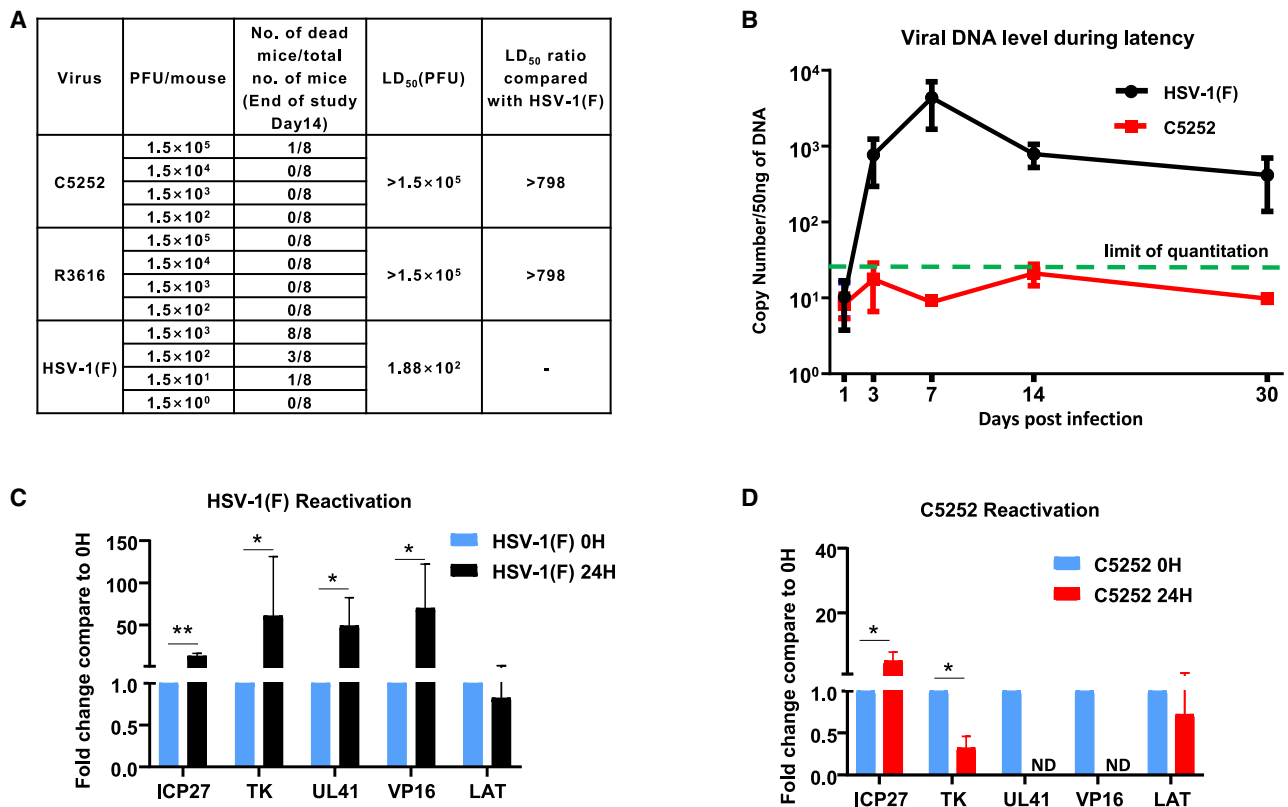

**Figure 4. The safety evaluation of C5252 in vivo**

(A) The results of LD<sub>50</sub> after intracranial injection. Neurovirulence was observed after intracranial administration of HSV-1(F), R3616, and C5252. LD<sub>50</sub> values were determined for each group. LD<sub>50</sub> for C5252 exceeded the maximum administered dose (1.5 × 10<sup>5</sup> PFUs/animal), while HSV-1(F) had an LD<sub>50</sub> of 1.88 × 10<sup>2</sup> PFUs/animal. (B) Quantification of viral DNA expression in mice TG during latency. BALB/c mice were infected with HSV-1(F) or C5252 via the corneal route. TGs were extracted at various time points, and viral genome DNA copy numbers were quantified and normalized to cellular DNA. (C) TGs excised 30 days after inoculation of HSV-1(F) were processed immediately or after 24 h of incubation with anti-NGF antibody. Fold changes in mRNA levels encoding *ICP27*, *TK*, *UL41*, *VP16*, and *LAT* compared to 0 h are shown (\**p* < 0.05 and \*\**p* < 0.01). (D) TGs excised 30 days after inoculation of C5252 were processed immediately or after 24 h of incubation with anti-NGF antibody. Fold changes in mRNA levels encoding *ICP27*, *TK*, *UL41*, *VP16*, and *LAT* compared to 0 h are shown. Data are presented as mean ± SD.

C5252 has increased anti-tumor activity compared to control oHSV R3616 in both human orthotopic and subcutaneous GBM models mentioned. In the syngeneic mouse model, C8282, expressing murine IL-12 and anti-PD-1 Ab, also showed an enhanced reduction of tumor volume when compared to backbone virus C1212. The murine version of C8282 was constructed, as human IL-12 and anti-PD-1 Ab used in C5252 have no cross-reaction with their corresponding murine receptor or binding protein.<sup>31</sup> The payload IL-12 is a cytokine with potent anti-tumor efficacy by induction of IFN-γ production and anti-angiogenic activity.<sup>32–34</sup> In addition, IL-12 can reshape the TME, driving increased infiltration of proinflammatory CD<sup>4+</sup> T cells and decreasing the numbers of regulatory T cells and the activation of the myeloid compartment.<sup>35,36</sup> Giulia Agliardi et al. has shown that the local delivery of IL-12 may be an effective adjuvant for CAR-T cell therapy for GBM.<sup>37</sup> The other payload of C5252, the immune checkpoint inhibitor (PD-1 Ab nivolumab), has been used in a phase 3 trial for GBM, which did not meet the primary endpoint.<sup>38</sup>

Thus, combination of PD-1 Ab with other therapies, including oHSV, e.g., M032 (NSC733972), is ongoing.

Taken together, our findings indicate that intracranial inoculation of C5252 and C8282 is safe and effective in GBM models. This preclinical safety data, along with the promising anti-tumor efficacy results, strongly support the translation of C5252 and the development of a phase 1 clinical trial in patients with recurrent or progressive GBM. C5252 expressing IL-12 and anti-PD-1 Ab represents a new generation of combination therapy for GBM with the potential to provide significant benefits to patients.

## MATERIALS AND METHODS

### Cell lines

Vero cells were purchased from the American Type Culture Collection. A172, D54, U138, U87, and D458 cells are commonly studied GBM cell lines that were obtained from JOINN Biologics. U-87MG-Luc tumor cells were purchased from Caliper Life

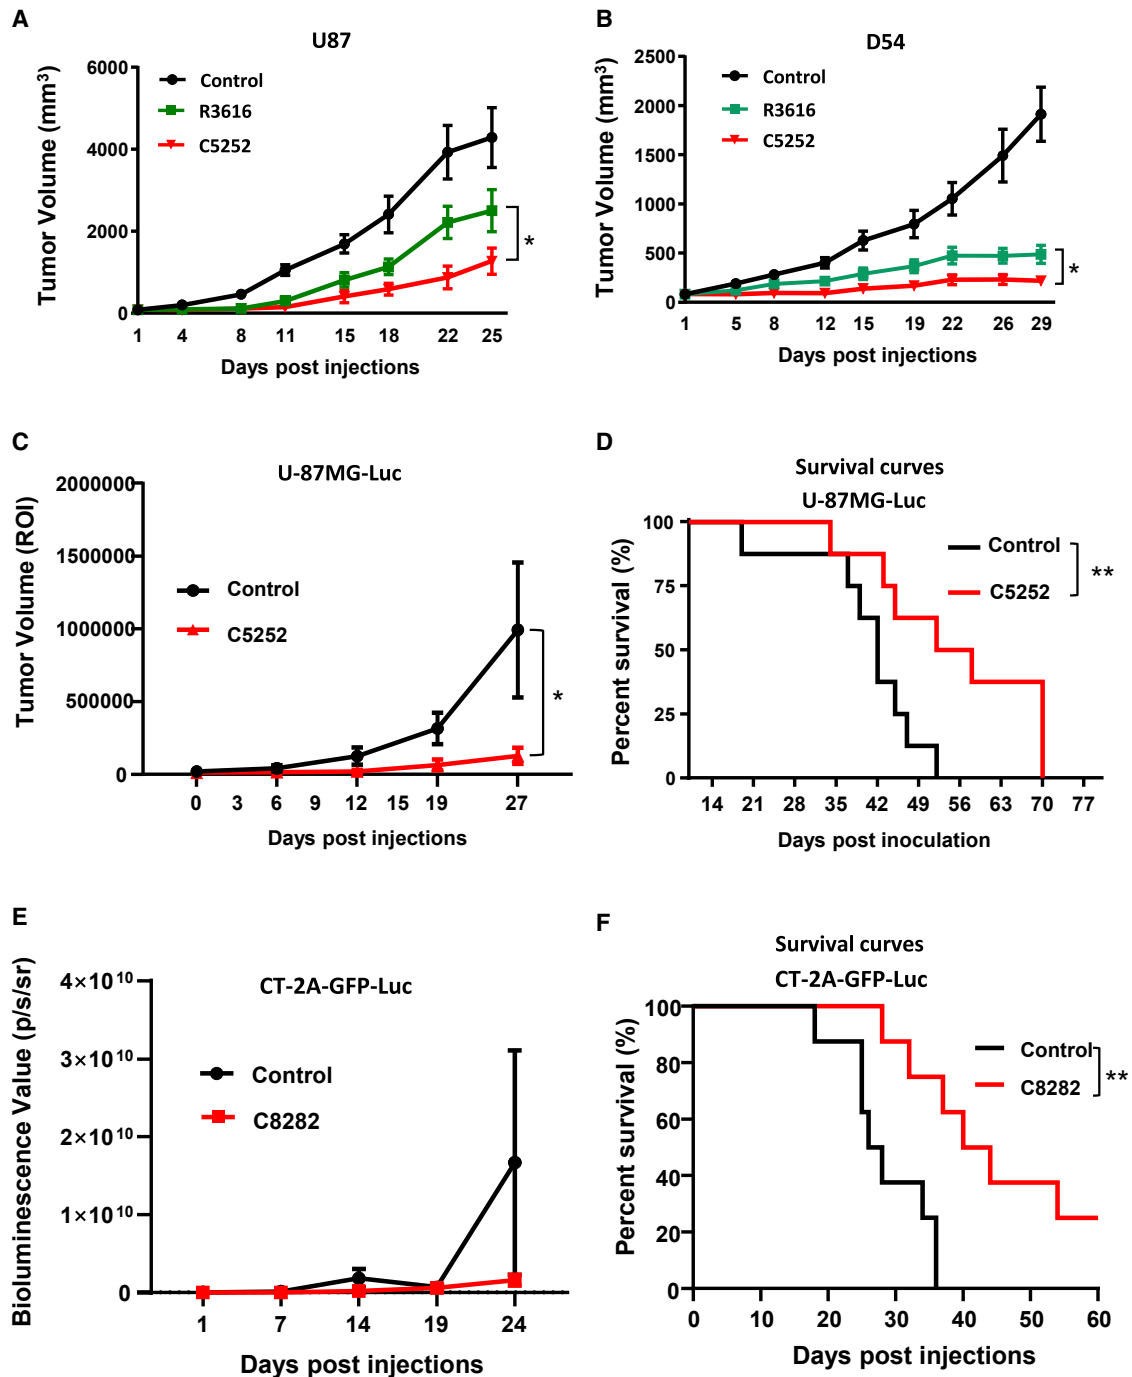

**Figure 5. The anti-tumor therapeutic efficacy of C5252 in a subcutaneous glioblastoma model and an orthotopic glioblastoma model**

(A and B) Subcutaneous glioblastoma model. Subcutaneous U87 (A) and D54 (B) tumors were established in BALB/c-derived nude mice. Tumor-bearing mice were treated with intratumoral injections of control, R3616 ( $5 \times 10^6$  PFUs/animal), or C5252 ( $5 \times 10^6$  PFUs/animal) on specified days. Tumor volumes are represented as mean  $\pm$  SD for 6 animals per group. Statistically significant differences between C5252 and R3616 group are indicated (\* $p < 0.05$ ). (C) C5252 in orthotopic tumor model. Female BALB/c nude mice received intracerebral inoculation with U-87MG-Luc tumor cells. Mice were treated with intratumoral injections of C5252 ( $3 \times 10^5$  PFUs/animal in  $5 \mu\text{L}$ ) at specific intervals. Tumor volume (ROI) is shown as mean  $\pm$  SD. Statistically significant differences between C5252 and control group are indicated (\* $p < 0.05$ ). The Luc images are presented in Figure S5A. (D) Survival curves. Survival curves demonstrating the significant survival benefit of C5252 treatment are shown. Statistically significant differences

(legend continued on next page)



Sciences. CT-2A cells were purchased from Shanghai Cell Bank. CT-2A-GFP-Luc tumor cells were purchased from Shenzhen SAFE Pharmaceutical. Vero cells were maintained in 5% (v/v) newborn bovine serum (NBCS, Gibco, Grand Island, NY, USA). GBM cell lines (A172, D54, U138, U87, D458, CT-2A, and CT-2A-GFP-Luc tumor cells) were maintained in DMEM (Gibco) supplemented with 10% (v/v) fetal bovine serum (FBS; Gibco). U-87MG-Luc tumor cells were maintained in Eagle's minimal essential medium (ATCC, Manassas, VA, USA) supplemented with 10% (v/v) FBS.

### Virus

HSV-1(F), the prototype HSV-1 strain used in this laboratory. C5252 was constructed by deleting both copies of the  $\gamma$ 34.5 gene and inserting an anti-human PD-1 Ab (PD-1 Fab) expression cassette between  $U_L3$  and  $U_L4$ , and a modified IR region was replaced by an IL-12 expression cassette with the aid of a bacterial artificial chromosome system. C8282 is the murine version of C5252, insertion genes encoding murine IL-12 and anti-PD-1 Ab. C1212 is the backbone of C5252 oncolytic viruses. R3616 was reported elsewhere.<sup>24</sup> The propagation of the virus and determination of its titer were performed using Vero cells.

### Abs

Abs against ICP8, ICP0, and ICP4 were purchased from Abcam (Cambridge, UK). Abs against  $U_S11$  have been described elsewhere.<sup>39</sup> Abs against  $\gamma$ 34.5 and ICP27 were kind gifts from Bernard Roizman (University of Chicago, Chicago, IL, USA). Additional Abs used in this study were anti-GAPDH (Sungene Biotech, Tianjin, China), anti-CNTFR (Abcam), and FLAG Tag Mouse monoclonal Ab (Beyotime, Shanghai, China).

### Growth curve determination

Vero cells were seeded in a 6-well plate at densities of  $1 \times 10^6$  cells per well. The cells were subsequently exposed to 0.1 PFU of HSV-1(F), R3616, or C5252 virus. The cells were harvested at 3, 6, 12, 24, and 48 hpi. Viral progeny was titrated by plaque assay following three freeze-thaw cycles.

### Virus titer determination

A172, D54, U138, U87, or D458 cells were seeded in a 6-well plate at densities of  $1 \times 10^6$  cells per well. The cells were subsequently exposed to 0.1 or 1.0 PFUs of HSV-1(F), R3616, or C5252 virus. The cells were harvested at 48 hpi. Viral progeny was titrated by plaque assay after three freeze-thaw cycles.

### Plaque assay

The virus titer was determined on Vero cells. The growth curve sample and GBM cell lines samples were maintained in DMEM supple-

mented with 1% FBS plus 0.05% (w/v) human pooled immunoglobulin (WEIGUANG, Shenzhen, China) for 72 h. The cells were fixed with 4% (w/v) paraformaldehyde for 30 min, rinsed three times with PBS, and stained with Giemsa (DINGGUO, Beijing, China). The viral plaque was counted and visually confirmed.

### Immunoblotting assays

The Vero cells were harvested at the indicated time points after infection by being scraped into the medium, rinsed with PBS, and solubilized in RIPA buffer (Beyotime) supplemented with PMSF (Beyotime) as specified by the manufacturer. Samples containing protein were denatured in  $5 \times$  SDS loading buffer, boiled for 10 min, electrophoretically separated on a 10% denaturing polyacrylamide gel, electrically transferred to a nitrocellulose sheet, blocked, and then reacted overnight at 4°C with the appropriate primary Abs diluted in PBS with 1% non-fat milk. The protein bands were scanned with an Image Lab scanner (BioRad).

### Human IL-12 p70 and anti-PD-1 Ab analysis

The human IL-12 p70 Quantikine ELISA Kit was purchased from R&D Systems (Minneapolis, MN, USA). The samples were quantified by ELISA according to the manufacturer's instructions. Anti-PD-1 Ab analysis methods were reported elsewhere.<sup>40</sup>

### CCK8 assay

The tumor cell-killing activity was assessed using a Cell Counting Kit 8 (CCK8) assay. Briefly, A172, D54, U138, U87, or D458 cells were plated in 96-well plates at  $5 \times 10^3$  cells/well. The cells were infected with 0.1 or 1.0 PFUs/cell of HSV-1(F), R3616, or C5252 for 48 h. Cell viability was evaluated using CCK8 (Beyotime) according to the manufacturer's instructions. The cell inhibition rate was calculated according to the following formula: cell inhibition rate (100%) = [(a value of target cell wells) - (a value of experimental wells)] / [(a value of target cell wells) - (a value of the blank wells)]  $\times$  100%. The assay was performed in triplicate.

### Overexpression of CNTFR $\alpha$

Overexpression of CNTFR $\alpha$  was achieved by utilizing the Pc-CNTFR $\alpha$  plasmid with a FLAG tag (YouBio, Hunan, China), while Pc-DNA3.1 served as the control plasmid. GBM cells were seeded in 12-well plates 1 day before transfection in DMEM containing 10% FBS. The following day, the aforementioned plasmids were transfected into the GBM cells using Lipofectamine 8000 (Beyotime), following the manufacturer's instructions. After 48 h post-transfection, the cells were infected with 1 PFU of either R3616 or C5252 per cell.

### Knockdown of CNTFR $\alpha$ in GBM cells by siRNA

The knockdown of CNTFR $\alpha$  was achieved using siRNAs (GenePharma, Shanghai, China). The sequences of the siRNA were

---

between C5252 and control group are indicated (\*\* $p < 0.01$ ) using Kaplan-Meier analysis. (E) C8282 in orthotopic tumor model. Female C57BL/6 mice received intracerebral inoculation with CT-2A-GFP-Luc tumor cells ( $2 \times 10^3$  cells/animal). Mice were treated with intratumoral injections of C8282 ( $1 \times 10^5$  PFUs/animal in 5  $\mu$ L) at specific intervals. Tumor volume (ROI) is shown as mean  $\pm$  SD. The images are presented in Figure S5B. (F) Survival curves. Survival curves demonstrating the significant survival benefit of C8282 treatment are shown. Statistically significant differences between C8282 and control group are indicated (\*\* $p < 0.01$ ) using Kaplan-Meier analysis.

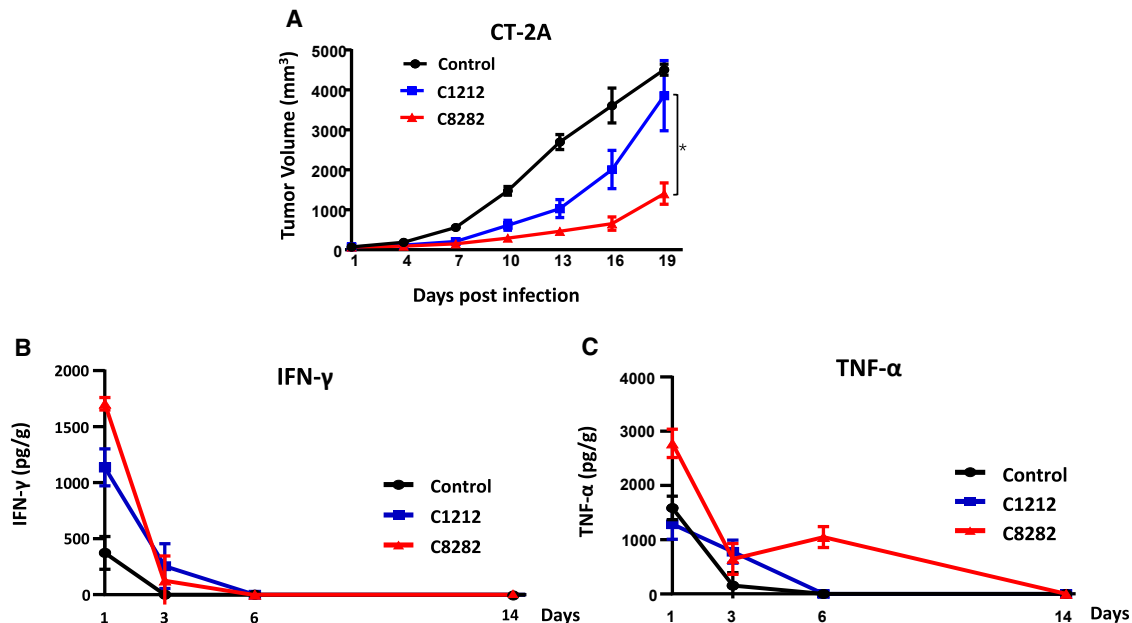

**Figure 6. In vivo anti-tumor efficacy with syngeneic mouse model**

(A) C57BL/6 mice were used as the syngeneic host for the CT-2A cell line. In tumor treatment studies, C57BL/6 mice ( $n = 6$  per group) were treated with C8282 or C1212 virus ( $1 \times 10^7$  PFUs/mouse) via intratumoral injection on days 1, 4, 7, 10, 13, and 16 six times in total. The sizes of tumors were measured on days 1, 4, 7, 10, 13, 16, and 19 before every administration using a caliper, and the volume was calculated as  $(\text{length} \times \text{width}^2) \times 0.5$ . The results are shown as mean tumor volume ( $\text{mm}^3 \pm \text{SD}$ ) ( $n = 6$ ). Statistically significant differences between C8282 and C1212 group were analyzed by Student's *t* test (two-tailed) using GraphPad Prism software ( $*p < 0.05$ ). On the final day of the experiment, the tumors in the mice were dissected, and the images are shown in the Figure S6. Murine IFN- $\gamma$  (B) and murine TNF- $\alpha$  (C) production in CT-2A syngeneic mice infected with control (DPBS+10% glycerin), C1212, or C8282 ( $1 \times 10^7$  PFUs/mouse) on days 0. CT-2A tumor samples from each mouse were collected on days 1, 3, 6, and 14 following infection ( $n = 3$  mice per time point) for the determination of murine IFN- $\gamma$  and murine TNF- $\alpha$  levels by ELISA. The results are reported as pg/g of tumor.

as follows: CNTFR $\alpha$  siRNA (si-CNTFR $\alpha$ ): 5'-CCUACAUUCCCAA CACCUUTT-3'; and negative control (si-NT): 5'-UUCUCCGAAC GUGUCACGUTT-3'.

The siRNA transfections were carried out using Lipofectamine 8000 (Beyotime) according to the manufacturer's instructions.

#### Caspase-3/7 activity assays

A172, D54, U138, U87, or D458 cells were seeded at a density of  $2 \times 10^3$  cells per well on 96-well plates and allowed to adhere overnight. Cells in triplicate wells were infected with 5 PFUs/cell of HSV-1(F), R3616, or C5252 virus, and the plates were incubated at 37°C with 5% CO<sub>2</sub> for 8 h. After treatment, the Caspase-Glo 3/7 (Promega, Madison, WI, USA) was prepared according to the manufacturer's guidelines, and 100  $\mu\text{L}$  of the reagent was added per well and incubated for 1 h at room temperature in the dark. The luminescent signal was recorded by a multimode microplate reader (Synergy Multi-Mode Reader, BioTek).

#### RNA extraction and real-time PCR

A172, D54, U138, U87, or D458 cells were plated and infected with 0.1 PFU/cell of HSV-1(F), R3616, or C5252 for 48 h. The total RNAs from cells were isolated using TRIzol reagent (Invitrogen, Carlsbad, CA, USA). A total amount of 0.5  $\mu\text{g}$  RNA was reverse tran-

scribed to cDNA using the PCR RT kit (TOYOBO, Tokyo, Japan) according to the manufacturer's instructions. Real-time PCR was performed using the StepOnePlus Real-Time PCR System (Applied Biosystems), and the amplifications were performed using the SYBR Premix (TaKaRa, Kusatsu, Japan). The mRNA expression levels were normalized by 18S rRNA and analyzed using the  $2^{-\Delta\Delta\text{CT}}$  method described elsewhere.<sup>41</sup>

The primers used for amplifications were as follows: CNTFR $\alpha$ -F: 5'-CTTACCCCAAGGGCTTCTACT-3'; CNTFR $\alpha$ -R: 5'-ACAGAC CATAATTTTGGAGCCAT-3'; 18S-F: 5'-CTCAACACGGGAAA CCTCAC-3'; and 18S-R: 5'-CGCTCCACCAACTAAGAACG-3'.

#### Animal models

All animal experiments were performed under protocols approved by the Institutional Animal Care and Use Committee of SAFE (Shenzhen, China) New Drug Research Technology Company. All mice used in this study were obtained from Vital River Laboratory Animal Technologies (Beijing, China).

#### Murine model assessment of neurovirulence following intracranial administration

Healthy female BALB/c mice with a body weight of about 18 g were selected randomly and divided into 3 groups ( $n = 8$  per group): R3616

and C5252 groups (at the dosages of  $1.5 \times 10^5$ ,  $1.5 \times 10^4$ ,  $1.5 \times 10^3$ , and  $1.5 \times 10^2$  PFUs/animal) and the HSV-1(F) group (at the dosages of  $1.5 \times 10^3$ ,  $1.5 \times 10^2$ , 15, and 1.5 PFUs/animal). With an inserted syringe needle 3–4 mm below the point bregma, the test article was slowly injected into the brain. After intracranial injection, animals were observed daily for 14 days, and survival data were processed to calculate LD<sub>50</sub>.

#### **Murine model of virus latent infection and reactivation**

Five-week-old inbred female BALB/c mice were infected by  $1 \times 10^5$  PFUs of HSV-1(F) virus and  $1 \times 10^6$  PFUs of C5252 recombinant virus through the corneal route. On the indicated days after infection (1, 3, 7, 14, and 30 days), TGs were extracted, and total DNA was isolated. Subsequently, a qPCR assay was performed using primers designed to target viral *gD* gene sequences to quantify the copy number of viral genome DNA. Bilateral trigeminal nerves were aseptically separated 30 days after infection, one side was cultured in 199V culture medium (Gibco) containing 100 ng/mL anti-NGF Ab (Abcam) for 24 h to induce virus reactivation, and the other side of TG was treated as a control group ( $n = 4$  per group). The TG RNA samples, either treated (24 h) or untreated (0 h) with an anti-NGF Ab, were extracted. Specific primers targeting HSV lytic genes (*ICP27*, *VP16*, *TK*, *UL41*) and *LAT* were used. The fold changes in the expression levels of these genes were calculated by comparing them to the baseline level at 0 h.

#### **Murine model of subcutaneous GBM**

The U87 and D54 tumor models were generated by subcutaneous implantation of  $1 \times 10^7$  U87 cells and D54 cells, respectively, into BALB/c nude mouse flanks. When the mean tumor volumes reached about 80 mm<sup>3</sup>, the mice were randomly grouped and treated as indicated. In tumor treatment studies, BALB/c nude mice ( $n = 6$  per group) were treated with R3616 or C5252 virus ( $5 \times 10^6$  PFUs/mouse) via intratumoral injection on days 1, 8, 15, and 22. The sizes of tumors were measured twice a week using a caliper, and the volume was calculated as  $(\text{length} \times \text{width}^2) \times 0.5$ . The results are presented as the mean  $\pm$  SD.

#### **C5252 in murine model of orthotopic tumor**

Female BALB/c nude mice were intracerebrally inoculated with 5  $\mu$ L U-87MG-Luc tumor cells ( $2 \times 10^5$  cells/animal) in the left striatum. The mice were randomized into 2 groups of 8 mice in each group 2 weeks after inoculation according to IVIS (In Vivo Imaging Systems) results. Mice were treated with C5252 ( $3 \times 10^5$  PFUs/animal in 5  $\mu$ L) every 3 days, 6 times in total. IVIS was performed once weekly to monitor tumor growth. Tumor volume (region of interest [ROI]) was presented as mean  $\pm$  SD.

#### **C8282 in murine model of orthotopic tumor**

Female C57BL/6 mice were intracerebrally inoculated with 10  $\mu$ L CT-2A-GFP-Luc tumor cells ( $2 \times 10^3$  cells/animal) 2 mm to the right of the anterior fontanelle and 0.5 mm anterior to the coronal suture. The mice were randomized into 2 groups of 8 mice in each group after 2 weeks with inoculation according to IVIS (In Vivo Imaging Systems) results. Mice were treated with C8282 ( $1 \times 10^5$  PFUs/animal

in 5  $\mu$ L) 3 times total at a frequency of once a week. IVIS was performed once weekly to monitor tumor growth. Tumor volume (ROI) was presented as mean  $\pm$  SD.

#### **Murine model of syngeneic mice**

The syngeneic mice models of CT-2A were generated by subcutaneous implantation of  $5 \times 10^5$  CT-2A cells into C57BL/6 mice ( $n = 6$  per group). Once the mice bearing tumors reached an average volume of 80 mm<sup>3</sup>, they were treated as indicated. In tumor treatment studies, C57BL/6 mice were treated with C8282 or C1212 virus ( $1 \times 10^7$  PFUs/mouse) via intratumoral injection on days 1, 4, 7, 10, 13, and 16. The sizes of tumors were measured on days 1, 4, 7, 10, 13, 16, and 19 using a caliper, and the volume was calculated as  $(\text{length} \times \text{width}^2) \times 0.5$ . The results are presented as the mean  $\pm$  SD.

#### **IFN- $\gamma$ and TNF- $\alpha$ analysis**

CT-2A tumor samples from each mouse were collected on days 1, 3, 6, and 14 (each time point  $n = 3$ ) following a single injection for the determination of mouse IFN- $\gamma$  (Beyotime) and mouse TNF- $\alpha$  (Beyotime) levels by ELISA, according to the manufacturer's instructions.

#### **DATA AND CODE AVAILABILITY**

The data and biological materials that support the findings of this study are available from the corresponding author upon request.

#### **SUPPLEMENTAL INFORMATION**

Supplemental information can be found online at <https://doi.org/10.1016/j.omton.2024.200799>.

#### **ACKNOWLEDGMENTS**

This research was supported by the Science and Technology Innovation Commission of Shenzhen, grant number JCYJ20220818102618040, and Longhua District Science and Innovation Commission Project Grants of Shenzhen, grant number 10162A20221027B1FA526.

#### **AUTHOR CONTRIBUTIONS**

Conceptualization, X.C., J.Z., and G.G.Z.; methodology, L.W. and X.Z.; validation, L.W. and X.Z.; formal analysis, L.W.; investigation, L.W., X.Z., Y.L., and Y.H.; writing – original draft preparation, L.W., J.Z., and X.C.; writing – review & editing, L.W., J.Z., X.C., X.Z., G.G.Z., P.R., and Y.C.; supervision, J.Z., X.C., and G.G.Z.; project administration, J.Z., X.C., and G.G.Z. All authors read and agreed to the published version of the manuscript.

#### **DECLARATION OF INTERESTS**

The authors declare no competing interests.

#### **REFERENCES**

1. Andreansky, S.S., He, B., Gillespie, G.Y., Soroceanu, L., Markert, J., Chou, J., Roizman, B., and Whitley, R.J. (1996). The application of genetically engineered herpes simplex viruses to the treatment of experimental brain tumors. *Proc. Natl. Acad. Sci. USA* 93, 11313–11318.

2. Gatto, L., Franceschi, E., Tosoni, A., Di Nunno, V., Bartolini, S., and Brandes, A.A. (2023). Glioblastoma treatment slowly moves toward change: novel druggable targets and translational horizons in 2022. *Expert Opin. Drug Discov.* *18*, 269–286.
3. Friedman, G.K., Pressey, J.G., Reddy, A.T., Markert, J.M., and Gillespie, G.Y. (2009). Herpes simplex virus oncolytic therapy for pediatric malignancies. *Mol. Ther.* *17*, 1125–1135.
4. Metzger, S., Weiser, A., Gerber, N.U., Oth, M., Scheinemann, K., Kraysenbühl, N., Grotzer, M.A., and Guerreiro Stucklin, A.S. (2022). Central nervous system tumors in children under 5 years of age: a report on treatment burden, survival and long-term outcomes. *J. Neuro Oncol.* *157*, 307–317.
5. Yan, G., Wang, Y., Chen, J., Zheng, W., Liu, C., Chen, S., Wang, L., Luo, J., and Li, Z. (2020). Advances in drug development for targeted therapies for glioblastoma. *Med. Res. Rev.* *40*, 1950–1972.
6. Patel, A.P., Tirosh, I., Trombetta, J.J., Shalek, A.K., Gillespie, S.M., Wakimoto, H., Cahill, D.P., Nahed, B.V., Curry, W.T., Martuza, R.L., et al. (2014). Single-cell RNA-seq highlights intratumoral heterogeneity in primary glioblastoma. *Science* *344*, 1396–1401.
7. McGranahan, N., Furness, A.J.S., Rosenthal, R., Ramskov, S., Lyngaa, R., Saini, S.K., Jamal-Hanjani, M., Wilson, G.A., Birkbak, N.J., Hiley, C.T., et al. (2016). Clonal neoantigens elicit T cell immunoreactivity and sensitivity to immune checkpoint blockade. *Science* *351*, 1463–1469.
8. Touat, M., Li, Y.Y., Boynton, A.N., Spurr, L.F., Iorgulescu, J.B., Bohrsen, C.L., Cortes-Ciriano, I., Birzu, C., Geduldig, J.E., Pelton, K., et al. (2020). Mechanisms and therapeutic implications of hypermutation in gliomas. *Nature* *580*, 517–523.
9. Wu, W., Klockow, J.L., Zhang, M., Lafortune, F., Chang, E., Jin, L., Wu, Y., and Daldrop-Link, H.E. (2021). Glioblastoma multiforme (GBM): An overview of current therapies and mechanisms of resistance. *Pharmacol. Res.* *171*, 105780.
10. Chambers, M.R., Bentley, R.T., Crossman, D.K., Foote, J.B., Koehler, J.W., Markert, J.M., Omar, N.B., Platt, S.R., Self, D.M., Shores, A., et al. (2020). The One Health Consortium: Design of a Phase I Clinical Trial to Evaluate M032, a Genetically Engineered HSV-1 Expressing IL-12, in Combination With a Checkpoint Inhibitor in Canine Patients With Sporadic High Grade Gliomas. *Front. Surg.* *7*, 59.
11. Jahan, N., Ghouse, S.M., Martuza, R.L., and Rabkin, S.D. (2021). In Situ Cancer Vaccination and Immunovirotherapy Using Oncolytic HSV. *Viruses* *13*, 1740.
12. Powles, T., Rosenberg, J.E., Sonpavde, G.P., Loriot, Y., Durán, I., Lee, J.L., Matsubara, N., Vulsteke, C., Castellano, D., Wu, C., et al. (2021). Enfortumab Vedotin in Previously Treated Advanced Urothelial Carcinoma. *N. Engl. J. Med.* *384*, 1125–1135.
13. Todo, T., Ito, H., Ino, Y., Ohtsu, H., Ota, Y., Shibahara, J., and Tanaka, M. (2022). Intratumoral oncolytic herpes virus G47Δ for residual or recurrent glioblastoma: a phase 2 trial. *Nat. Med.* *28*, 1630–1639.
14. Totsch, S.K., Schlappi, C., Kang, K.D., Ishizuka, A.S., Lynn, G.M., Fox, B., Beierle, E.A., Whitley, R.J., Markert, J.M., Gillespie, G.Y., et al. (2019). Oncolytic herpes simplex virus immunotherapy for brain tumors: current pitfalls and emerging strategies to overcome therapeutic resistance. *Oncogene* *38*, 6159–6171.
15. Cao, J., and Yan, Q. (2020). Cancer Epigenetics, Tumor Immunity, and Immunotherapy. *Trends Cancer* *6*, 580–592.
16. Nakashima, H., Nguyen, T., and Chiocca, E.A. (2015). Combining HDAC inhibitors with oncolytic virotherapy for cancer therapy. *Oncolytic Virother.* *4*, 183–191.
17. Patel, D.M., Foreman, P.M., Nabors, L.B., Riley, K.O., Gillespie, G.Y., and Markert, J.M. (2016). Design of a Phase I Clinical Trial to Evaluate M032, a Genetically Engineered HSV-1 Expressing IL-12, in Patients with Recurrent/Progressive Glioblastoma Multiforme, Anaplastic Astrocytoma, or Gliosarcoma. *Hum. Gene Ther. Clin. Dev.* *27*, 69–78.
18. Friedman, G.K., Bernstock, J.D., Chen, D., Nan, L., Moore, B.P., Kelly, V.M., Youngblood, S.L., Langford, C.P., Han, X., Ring, E.K., et al. (2018). Enhanced Sensitivity of Patient-Derived Pediatric High-Grade Brain Tumor Xenografts to Oncolytic HSV-1 Virotherapy Correlates with Nectin-1 Expression. *Sci. Rep.* *8*, 13930.
19. Xie, X., Lv, J., Zhu, W., Tian, C., Li, J., Liu, J., Zhou, H., Sun, C., Hu, Z., and Li, X. (2022). The combination therapy of oncolytic HSV-1 armed with anti-PD-1 antibody and IL-12 enhances anti-tumor efficacy. *Transl. Oncol.* *15*, 101287.
20. Dambach, M.J., Trecki, J., Martin, N., and Markovitz, N.S. (2006). Oncolytic viruses derived from the gamma34.5-deleted herpes simplex virus recombinant R3616 encode a truncated UL3 protein. *Mol. Ther.* *13*, 891–898.
21. Weis, J., Schönrock, L.M., Züchner, S.L., Lie, D.C., Sure, U., Schul, C., Stögbauer, F., Ringelstein, E.B., and Halfter, H. (1999). CNTF and its receptor subunits in human gliomas. *J. Neuro Oncol.* *44*, 243–253.
22. Adamus, G., Sugden, B., Shiraga, S., Timmers, A.M., and Hauswirth, W.W. (2003). Anti-apoptotic effects of CNTF gene transfer on photoreceptor degeneration in experimental antibody-induced retinopathy. *J. Autoimmun.* *21*, 121–129.
23. Fan, K., Wang, X., Zhang, J., Ramos, R.I., Zhang, H., Li, C., Ye, D., Kang, J., Marzese, D.M., Hoon, D.S.B., and Hua, W. (2017). Hypomethylation of CNTFRalpha is associated with proliferation and poor prognosis in lower grade gliomas. *Sci. Rep.* *7*, 7079.
24. Chou, J., Kern, E.R., Whitley, R.J., and Roizman, B. (1990). Mapping of herpes simplex virus-1 neurovirulence to gamma 134.5, a gene nonessential for growth in culture. *Science* *250*, 1262–1266.
25. Du, T., Zhou, G., and Roizman, B. (2012). Induction of apoptosis accelerates reactivation of latent HSV-1 in ganglionic organ cultures and replication in cell cultures. *Proc. Natl. Acad. Sci. USA* *109*, 14616–14621.
26. Du, T., Zhou, G., and Roizman, B. (2011). HSV-1 gene expression from reactivated ganglia is disordered and concurrent with suppression of latency-associated transcript and miRNAs. *Proc. Natl. Acad. Sci. USA* *108*, 18820–18824.
27. Thompson, R.L., and Sawtell, N.M. (1997). The herpes simplex virus type 1 latency-associated transcript gene regulates the establishment of latency. *J. Virol.* *71*, 5432–5440.
28. Whitley, R.J., Kern, E.R., Chatterjee, S., Chou, J., and Roizman, B. (1993). Replication, establishment of latency, and induced reactivation of herpes simplex virus gamma 1 34.5 deletion mutants in rodent models. *J. Clin. Invest.* *91*, 2837–2843.
29. Sundaresan, P., Hunter, W.D., Martuza, R.L., and Rabkin, S.D. (2000). Attenuated, replication-competent herpes simplex virus type 1 mutant G207: safety evaluation in mice. *J. Virol.* *74*, 3832–3841.
30. He, B., Gross, M., and Roizman, B. (1997). The gamma(1)34.5 protein of herpes simplex virus 1 complexes with protein phosphatase 1alpha to dephosphorylate the alpha subunit of the eukaryotic translation initiation factor 2 and preclude the shutoff of protein synthesis by double-stranded RNA-activated protein kinase. *Proc. Natl. Acad. Sci. USA* *94*, 843–848.
31. Hellums, E.K., Markert, J.M., Parker, J.N., He, B., Perbal, B., Roizman, B., Whitley, R.J., Langford, C.P., Bharara, S., and Gillespie, G.Y. (2005). Increased efficacy of an interleukin-12-secreting herpes simplex virus in a syngeneic intracranial murine glioma model. *Neuro Oncol.* *7*, 213–224.
32. Bramson, J.L., Hitt, M., Addison, C.L., Muller, W.J., Gaudie, J., and Graham, F.L. (1996). Direct intratumoral injection of an adenovirus expressing interleukin-12 induces regression and long-lasting immunity that is associated with highly localized expression of interleukin-12. *Hum. Gene Ther.* *7*, 1995–2002.
33. Manetti, R., Parronchi, P., Giudizi, M.G., Piccinni, M.P., Maggi, E., Trinchieri, G., and Romagnani, S. (1993). Natural killer cell stimulatory factor (interleukin 12 [IL-12]) induces T helper type 1 (Th1)-specific immune responses and inhibits the development of IL-4-producing Th cells. *J. Exp. Med.* *177*, 1199–1204.
34. Voest, E.E., Kenyon, B.M., O'Reilly, M.S., Truitt, G., D'Amato, R.J., and Folkman, J. (1995). Inhibition of angiogenesis in vivo by interleukin 12. *J. Natl. Cancer Inst.* *87*, 581–586.
35. Tugues, S., Burkhard, S.H., Ohs, I., Vrohings, M., Nussbaum, K., Vom Berg, J., Kulig, P., and Becher, B. (2015). New insights into IL-12-mediated tumor suppression. *Cell Death Differ.* *22*, 237–246.
36. Kueberuwa, G., Kalaitidou, M., Cheadle, E., Hawkins, R.E., and Gilham, D.E. (2018). CD19 CAR T Cells Expressing IL-12 Eradicate Lymphoma in Fully Lymphoreplete Mice through Induction of Host Immunity. *Mol. Ther. Oncolytics* *8*, 41–51.
37. Agliardi, G., Liuzzi, A.R., Hotblack, A., De Feo, D., Núñez, N., Stowe, C.L., Friebel, E., Nannini, F., Rindlisbacher, L., Roberts, T.A., et al. (2021). Intratumoral IL-12 delivery empowers CAR-T cell immunotherapy in a pre-clinical model of glioblastoma. *Nat. Commun.* *12*, 444.
38. Reardon, D.A., Brandes, A.A., Omuro, A., Mulholland, P., Lim, M., Wick, A., Baehring, J., Ahluwalia, M.S., Roth, P., Bähr, O., et al. (2020). Effect of

- Nivolumab vs Bevacizumab in Patients With Recurrent Glioblastoma: The CheckMate 143 Phase 3 Randomized Clinical Trial. *JAMA Oncol.* 6, 1003–1010.
39. Roller, R.J., and Roizman, B. (1992). The herpes simplex virus 1 RNA binding protein US11 is a virion component and associates with ribosomal 60S subunits. *J. Virol.* 66, 3624–3632.
40. Yan, R., Zhou, X., Chen, X., Liu, X., Tang, Y., Ma, J., Wang, L., Liu, Z., Zhan, B., Chen, H., et al. (2019). Enhancement of oncolytic activity of oHSV expressing IL-12 and anti PD-1 antibody by concurrent administration of exosomes carrying CTLA-4 miRNA. *Immunotherapy* 5, 154.
41. Livak, K.J., and Schmittgen, T.D. (2001). Analysis of relative gene expression data using real-time quantitative PCR and the 2<sup>-Delta Delta C(T)</sup> Method. *Methods* 25, 402–408.



**OMTON, Volume 32**

**Supplemental information**

**Enhanced therapeutic efficacy for glioblastoma  
immunotherapy with an oncolytic herpes simplex virus armed with anti-  
PD-1 antibody and IL-12**

**Lei Wang, Xusha Zhou, Xiaoqing Chen, Yuanyuan Liu, Yue Huang, Yuan Cheng, Peigen Ren, Jing Zhao, and Grace Guoying Zhou**

Figure S1

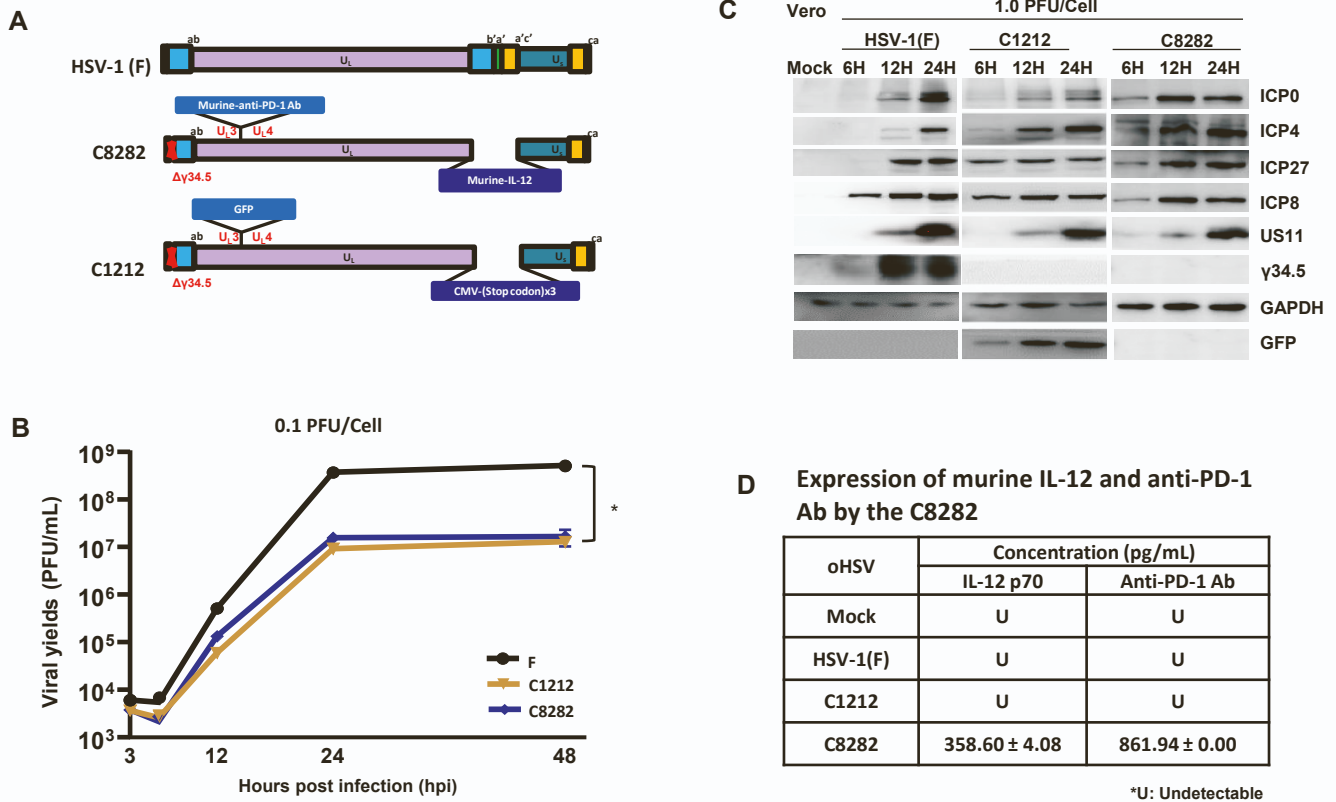

**Figure S1. Construction and Identification of C8282.** (A). **Virus genome schematic.** Schematic representation of the virus genome, including wild-type HSV-1(F), C1212 (control), and C8282 (murine version of C5252). C8282 contains an expression cassette for the murine IL-12 heterodimer and an antigen-binding fragment (Fab) of anti-murine PD-1Ab, with the IR region replaced. (B). **Growth Curves.** Vero cells exposed to 0.1 PFU of HSV-1(F), C1212, or C8282 per cell. Virus progeny collected at various time points (3, 6, 12, 24, and 48 h) and titered using Vero cells (\* $p < 0.05$ ). (C). **Accumulation of Viral Protein.** Vero cells infected with 1.0 PFU of HSV-1(F), C1212, or C8282 per cell for 6, 12, and 24 h. Cell samples collected at specified hours post-infection. Proteins separated on 10% denaturing gels and analyzed via immunoblotting with antibodies against specific viral and cellular proteins. (D). **Expression of Murine IL-12 p70 and Anti-PD-1 Ab.**

Figure S2

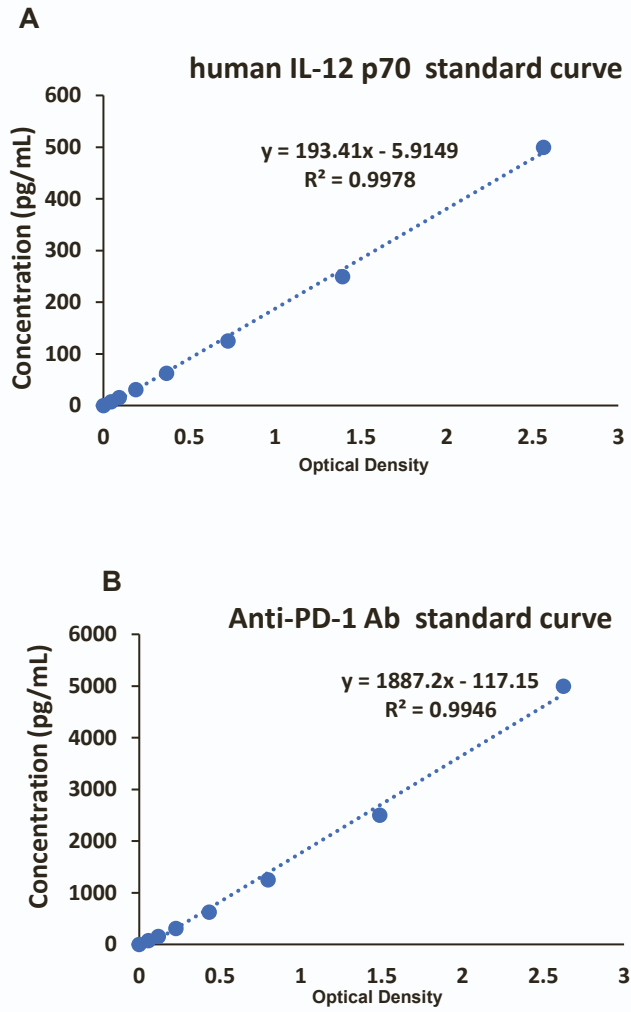

Figure S2. Standard Curves for IL-12 p70 and Anti-PD-1 Antibody.

Figure S3

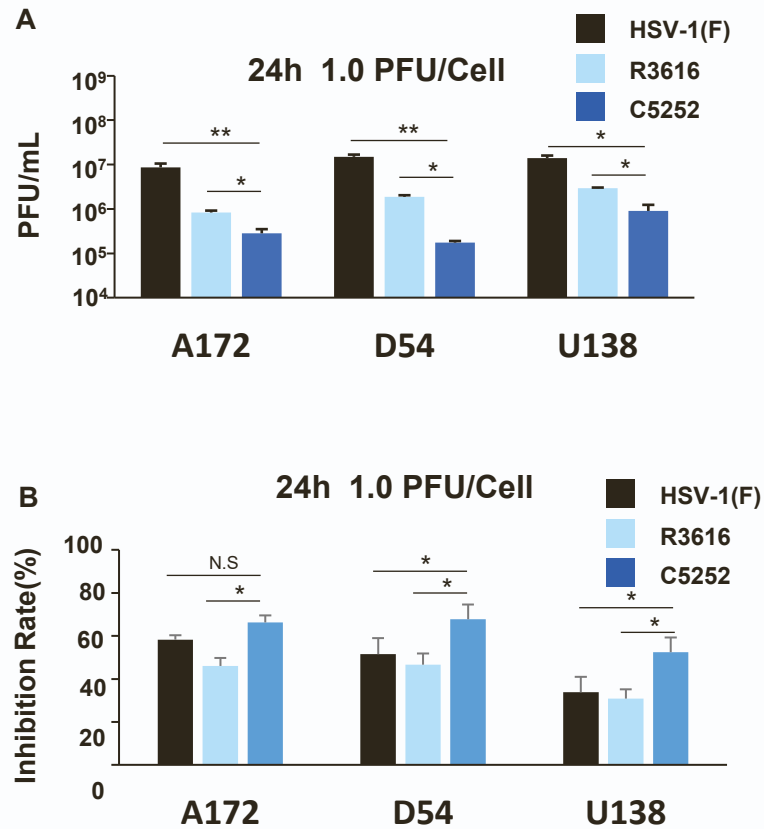

**Figure S3. Virus replication and cytotoxicity in glioblastoma cells. (A). Viral Yields in Glioblastoma Cells.** A172, D54, and U138 glioblastoma cells were exposed to 1.0 PFU of HSV-1(F), R3616, or C5252 per cell. After 2 hours, the inoculum was replaced with fresh medium. Virus progeny was harvested at 24 hpi and quantified using Vero cells. Data presented as mean±SD. **(B). Virus Cytotoxicity in Glioblastoma Cells.** Cytotoxicity of HSV-1(F), R3616, and C5252 in A172, D54, and U138 glioblastoma cells assessed using a CCK8 assay. Cells infected with 1.0 PFU/cell, and cell inhibition rates were measured at 24 hpi. Assays conducted in triplicate, and data represented as mean ± SD. Statistical differences analyzed with a two-tailed Student's t-test (\*p < 0.05, \*\*p < 0.01, <sup>N.S</sup>p > 0.05).

**Figure S4**

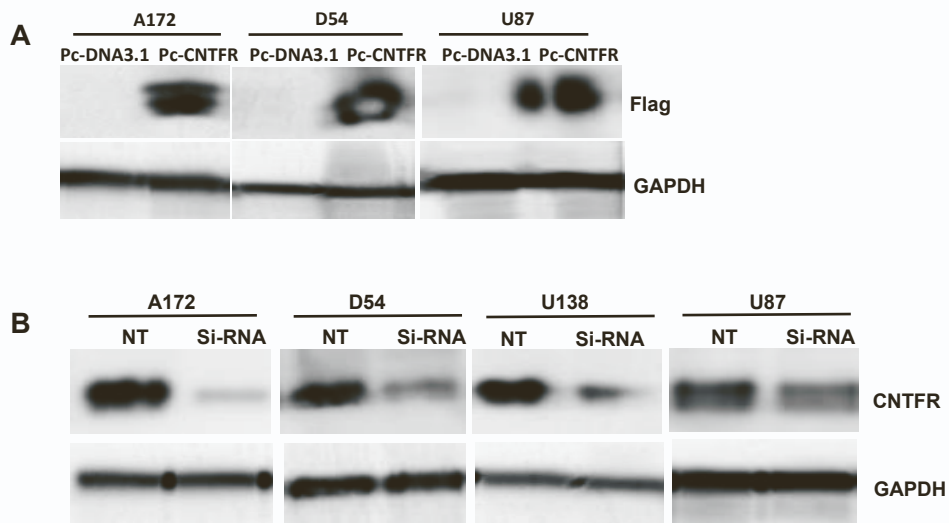

**Figure S4. (A). Upregulation of CNTFR $\alpha$ .** A172, D54, and U87 cells were transfected with Pc-CNTFR $\alpha$  with a Flag tag and Pc-DNA3.1 plasmid for 48 hours. Cell samples collected at specified hours post-infection. Proteins separated on 10% denaturing gels and analyzed via immunoblotting with antibodies against Flag or GAPDH. **(B). Downregulation of CNTFR $\alpha$ .** A172, D54, U138, and U87 cells were transfected with si-CNTFR $\alpha$  and si-NT for 72 hours. Cell samples collected at specified hours post-infection. Proteins separated on 10% denaturing gels and analyzed via immunoblotting with antibodies against CNTFR $\alpha$  or GAPDH.



Figure S5

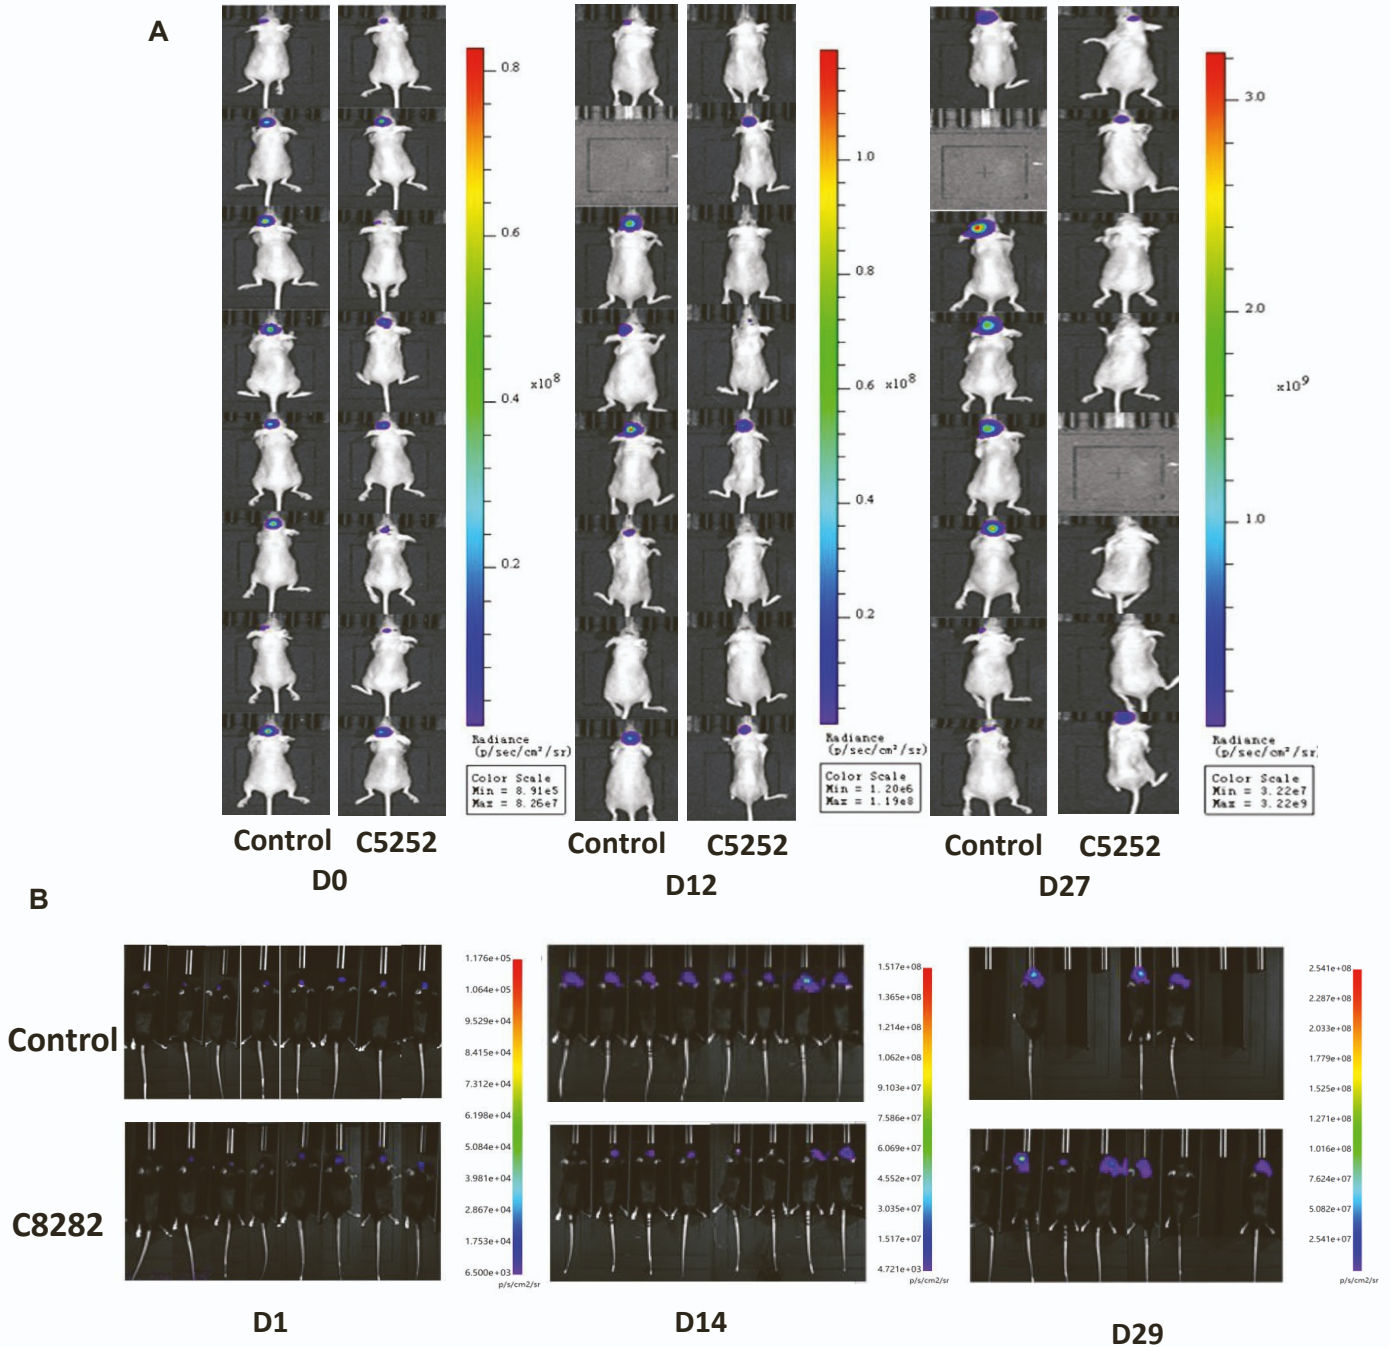

**Figure S5. (A). The Luciferase (Luc) Image in the U-87MG-Luc Orthotopic Tumor Model.** In U-87MG-Luc tumor model, luciferase (Luc) imaging was performed to visualize and monitor tumor growth. The emitted bioluminescent signal from luciferase-expressing tumor cells was captured and presented in the image. **(B). The Luciferase (Luc) Image in the CT-2A-GFP-Luc Orthotopic Tumor Model.** In the CT-2A-GFP-Luc tumor model, luciferase (Luc) imaging was conducted to visualize and monitor tumor progression. The emitted bioluminescent signal from luciferase-expressing tumor cells was captured and depicted in the image, providing insights into tumor growth dynamics.

**Figure S6**

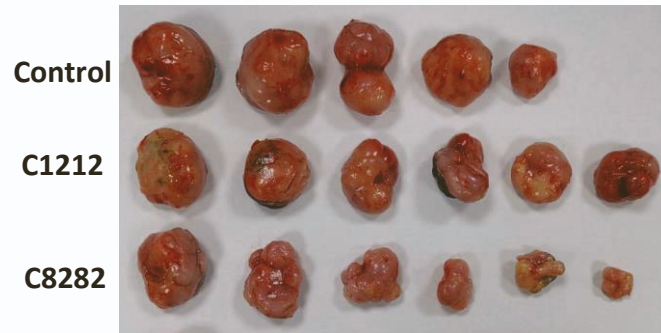

**Figure S6. Dissection of CT-2A Murine Model.** After the conclusion of the murine tumor model experiment, mice were euthanized, and tumor dissections were carried out. Tumor samples were carefully collected.
